# Identifying Sequence Perturbations to an Intrinsically Disordered Protein that Determine Its Phase Separation Behavior

Benjamin S. Schuster<sup>1,a,b</sup>, Gregory L. Dignon<sup>1,c,d</sup>, Wai Shing Tang<sup>e</sup>, Fleurie M. Kelley<sup>b</sup>, Aishwarya Kanchi Ranganath<sup>b</sup>, Craig N. Jahnke<sup>f</sup>, Alison G. Simpkins<sup>f</sup>, Roshan Mammen Regy<sup>c</sup>, Daniel A. Hammer<sup>a,f</sup>, Matthew C. Good<sup>a,g</sup>, Jeetain Mittal<sup>c,2</sup>

<sup>a</sup> Department of Bioengineering, University of Pennsylvania, Philadelphia, PA, 19104

<sup>b</sup> Department of Chemical and Biochemical Engineering, Rutgers University, Piscataway, NJ 08854

<sup>c</sup> Department of Chemical and Biomolecular Engineering, Lehigh University, Bethlehem, PA 18015

<sup>d</sup> Laufer Center for Physical and Quantitative Biology, Stony Brook University, Stony Brook, NY, 11794

<sup>e</sup> Department of Physics, Brown University, Providence, RI, 02912

<sup>f</sup> Department of Chemical and Biomolecular Engineering, University of Pennsylvania, Philadelphia, PA, 19104

<sup>g</sup> Department of Cell and Developmental Biology, University of Pennsylvania, Philadelphia, PA, 19104

<sup>1</sup> These authors contributed equally to this work

<sup>2</sup> Corresponding author

## Abstract (Currently 250/250 words)

Phase separation of intrinsically disordered proteins (IDPs) commonly underlies the formation of membraneless organelles, which compartmentalize molecules intracellularly in the absence of a lipid membrane. Identifying the protein sequence features responsible for IDP phase separation is critical for understanding physiological roles and pathological consequences of biomolecular condensation, as well as for harnessing phase separation for applications in bio-inspired materials design. To expand our knowledge of sequence determinants of IDP phase separation, we characterized variants of the intrinsically disordered RGG domain from LAF-1, a model protein involved in phase separation and a key component of P granules. Based on a predictive coarse-grained IDP model, we identified a region of the RGG domain that has high contact probability and is highly conserved between species; deletion of this region significantly disrupts phase separation *in vitro* and *in vivo*. We determined the effects of charge patterning on phase behavior through sequence shuffling. By altering the wild-type sequence, which contains well-mixed charged residues, to increase charge segregation, we designed sequences with significantly increased phase separation propensity. This result indicates the natural sequence is under negative selection to moderate this mode of interaction. We measured the contributions of tyrosine and arginine residues to phase separation experimentally through mutagenesis studies and computationally through direct interrogation of different modes of interaction using all-atom simulations. Finally, we show

37 that in spite of these sequence perturbations, the RGG-derived condensates remain liquid-like. Together,  
38 these studies advance a predictive framework and identify key biophysical principles of sequence  
39 features important to phase separation.

40

## 41 **Significance Statement (Currently 120/120 words)**

42 Membraneless organelles are assemblies of highly concentrated biomolecules that form through a  
43 liquid-liquid phase separation process. These assemblies are often enriched in intrinsically disordered  
44 proteins, which play an important role in driving phase separation. Understanding the sequence-to-phase  
45 behavior relationship of these disordered proteins is important for understanding the biochemistry of  
46 membraneless organelles, as well as for designing synthetic organelles and biomaterials. In this work, we  
47 explore a model protein, the disordered N-terminal domain of LAF-1, and highlight how three key features  
48 of the sequence control the protein's propensity to phase separate. Combining predictive simulations with  
49 experiments, we find that phase behavior of this model IDP is dictated by the presence of a short conserved  
50 domain, charge patterning, and arginine-tyrosine interactions.

51

## 52 **Introduction**

53 Liquid-liquid phase separation (LLPS) of biomolecules is a highly robust and ubiquitous  
54 phenomenon in biology, enabling compartmentalization in the absence of delimiting membranes<sup>1</sup>.  
55 Biomolecular LLPS commonly occurs within the cell, forming compartments that have been termed  
56 biomolecular condensates or membraneless organelles<sup>2</sup> and include stress granules<sup>3-5</sup>, P-granules<sup>1,6</sup>,  
57 nucleoli<sup>7</sup>, and numerous others<sup>8-13</sup>. Most membraneless organelles contain an overrepresentation of  
58 proteins with intrinsically disordered and low-complexity regions<sup>14</sup>, which are important drivers of phase  
59 separation behavior<sup>15,16</sup>. Therefore, decoding the sequence determinants of intrinsically disordered protein  
60 (IDP) phase separation is important for understanding the biochemistry of biomolecular condensates in  
61 physiological and pathophysiological conditions. Characterizing the effects of sequence on phase behavior  
62 is also important for the field of protein-based materials<sup>17</sup>, wherein proteins can be designed to have desired  
63 characteristics and programmable assembly<sup>18-20</sup>, with applications in biotechnology such as drug delivery,

64 cell engineering, and biomimetics<sup>21-24</sup>.

65 Here we investigate a model IDP sequence from LAF-1, which is a member of the DDX3 family of  
66 RNA helicases and is a major component of P-granules, membraneless organelles involved in germline  
67 specification in *C. elegans* embryos<sup>25</sup>. LAF-1 contains an N-terminal domain of 168 residues that is  
68 intrinsically disordered, followed by a folded helicase domain, and a short disordered prion-like domain at  
69 the C-terminus<sup>6</sup>. The N-terminal domain contains an abundance of glycine and arginine residues, with  
70 several occurrences of the motif RGG, and is hereafter referred to as LAF-1 RGG. Importantly, the RGG  
71 domain is necessary and sufficient for phase separation<sup>6</sup>, although both experimental and computational  
72 studies have shown that inclusion of the folded domain increases the protein's ability to phase separate<sup>26,27</sup>.

73 LAF-1 RGG is an excellent model system for exploring the sequence determinants of protein phase  
74 separation because it is believed to be fully disordered, and it contains a sufficient diversity of amino acids  
75 to enable different types of interactions<sup>28,29</sup>. The advantage of a fully disordered sequence is that it allows  
76 for relatively distributed interactions between all residues, so the relationship between amino acid  
77 composition and phase behavior can be more readily ascertained, as compared to proteins with residues  
78 buried in folded domains. LAF-1 was one of the first proteins found in biomolecular condensates in vivo and  
79 whose phase behavior was mapped in vitro, yet key questions remain about its properties and function<sup>6,27</sup>.  
80 Additionally, we have recently designed constructs based on LAF-1 RGG to generate micrometer-sized  
81 protein condensates that can respond to specific stimuli and that can selectively compartmentalize cargo  
82 proteins, progressing toward the design of synthetic organelles that may be expressed in cells and that are  
83 orthogonal to normal cellular function<sup>21</sup>. To advance the design of synthetic organelles, we seek to  
84 understand how perturbations to the RGG domain sequence may alter phase behavior in a predictable  
85 way<sup>18,30</sup>.

86 In this work, we use simulations and experiments to characterize the sequence-dependent LLPS  
87 of the LAF-1 RGG domain, identifying perturbations that result in significant changes to the phase behavior.  
88 First, we have identified a small hydrophobic region that exhibits high contact probability in coarse-grained  
89 (CG) molecular dynamics simulations, and that contains a well-conserved specific binding site for the  
90 eukaryotic translation initiation factor 4E (eIF4E)<sup>31</sup>. We demonstrate that removal of this region greatly  
91 reduces the phase separation propensity of the RGG domain in silico, in vitro, and in vivo in a eukaryotic

92 model, suggesting that the hydrophobic interactions within this region are also important to LLPS. Second,  
93 we show that shuffling the amino acid residues of the RGG sequence to introduce charge patterning can  
94 drastically increase phase separation propensity and that by simultaneously preserving the conserved  
95 hydrophobic region, we can further increase it. Third, we investigate alterations to amino acid composition  
96 by mutating tyrosine to phenylalanine and arginine to lysine, mutations that affect LLPS propensity of  
97 FUS<sup>30,32</sup>. We find that tyrosine to phenylalanine and arginine to lysine mutations both reduce the phase  
98 separation propensity of the LAF-1 RGG domain. We then identify the interaction mechanisms disrupted  
99 by these mutations as being hydrogen bonds, cation- $\pi$  interactions, and  $sp^2/\pi$  interactions, all three of  
100 which are present between arginine and tyrosine and may act cooperatively, whereas at least one of these  
101 is impossible upon mutation. Importantly, we rule out a previous model based exclusively on arginine-  
102 tyrosine interaction, which cannot predict the critical concentration for LAF-1 RGG phase separation.  
103 Finally, we show that the RGG-derived condensates remain liquid-like despite these three classes of  
104 sequence perturbations, indicating that phase behavior can be tuned independent from material properties.  
105 Our combined results elucidate fundamentally new and important sequence determinants of IDP phase  
106 separation while demonstrating a computationally-guided approach for studying phase behavior of  
107 biomolecular condensates. These results promise a framework toward the rational design of LLPS-enabled  
108 IDPs.

109

## 110 **Results**

### 111 **A short, conserved, hydrophobic region is important for LLPS of the RGG domain**

112 We focused our efforts on the RGG domain of LAF-1, as it is necessary and sufficient to drive  
113 phase separation<sup>6</sup>, making it an ideal model system to understand the sequence determinants of LLPS.  
114 Phase separation of LAF-1 RGG is hypothesized to be driven by several different modes of interaction,  
115 including electrostatic,  $\pi$ - $\pi$ , and cation- $\pi$  interactions<sup>27</sup>. In addition, hydrogen bonds and hydrophobic  
116 contacts may play a role in phase separation for sequences containing residues capable of such  
117 interactions<sup>16,33-37</sup>. However, it is difficult to characterize these interactions using experimental techniques  
118 due to the dynamic nature of the phase-separated proteins and the high spatiotemporal resolution needed



119 to probe the interactions<sup>35</sup>.

120 To provide insight into the sequence determinants of phase separation, we conducted simulations  
121 of a condensed assembly of 100 chains of LAF-1 RGG using a transferrable CG model (see Methods),  
122 which accounts for the combined interaction modes between each amino acid pair<sup>26</sup>. The condensed  
123 assembly is liquid-like, with chains exhibiting liquid-like diffusion, as we have shown in the previous work<sup>26</sup>.  
124 We then enumerated the average number of intermolecular contacts formed between each residue of the  
125 sequence with each residue in all other protein chains, which may represent many different modes of  
126 interaction at the atomic scale. The results highlighted a single region spanning residues 21-30  
127 (RYVPPHLRGG) having highly enhanced contact probability within the condensed protein assembly (Fig.  
128 1A). This region has a considerably different composition from the full RGG sequence, particularly since it  
129 contains several hydrophobic residues: this region contains the only two Pro, the only Val, and one of the  
130 only two Leu in the entire RGG domain. Region 21-30 is more prone to interaction, not only with itself but  
131 also with many regions of the protein (Fig. 1A).

132 Interestingly, subregion 21-28 corresponds exactly with the previously identified eIF4E-binding  
133 motif<sup>38</sup>. We conducted a homology search, which also confirmed this region as an important functional motif  
134 due to its high degree of conservation across diverse species (Fig. 1B, S1A; Supporting Methods). The  
135 level of conservation is likely due to its biological function, rather than its importance to phase separation  
136 per se. However, the presence of a domain prone to self-association will still make considerable  
137 contributions to phase separation<sup>39</sup>. We were curious whether this region alone would undergo LLPS, and  
138 thus conducted CG simulations on just the 8-residue fragment. Due to the small chain length and net  
139 charge, we were unable to observe LLPS for the fragment alone, even at very high concentrations and low  
140 temperatures (Movie S1).

141 We, therefore, conducted simulations to compare how deletion of residues 21-30 vs. other regions  
142 of the RGG domain affect phase behavior to gain additional insight into the extent to which different regions  
143 of the RGG domain contribute to phase separation. Previously, we have shown that the  $\theta$ -temperature ( $T_\theta$ ),  
144 where a single IDP chain behaves as in an ideal solvent, can serve as a good proxy for the critical  
145 temperature of phase separation ( $T_c$ )<sup>40</sup>, above which the IDP will always form a single continuous phase  
146 regardless of the protein concentration. Taking advantage of this relationship, we tested the effects of

147 deleting distinct 10-residue segments from the LAF-1 RGG sequence by conducting single-chain  
148 simulations across a range of temperatures. We identified  $T_{\theta}$  for each deletion and how it deviates from  
149 that of the WT RGG sequence (Fig. 1C). The  $\Delta 21-30$  variant shows the greatest reduction of  $\theta$ -temperature,  
150 indicating that it would have the lowest propensity to phase separate. In contrast, most other deletions had  
151 little effect or actually raised  $T_{\theta}$ . This strongly suggests that the sticky hydrophobic subregion has an  
152 important role in phase separation of the LAF-1 RGG domain. We note that many of the deletion sequences  
153 have a higher  $T_{\theta}$  than the full-length RGG, counter to the expectation that longer chain length generally  
154 favors LLPS. We believe this effect in the simulation model can be attributed to a subtle balance between  
155 the changes in hydrophobicity, net charge, and SCD rather than a single sequence descriptor (Figure S1B).  
156 Given the simplicity of our simulation model and the errors associated with predicting phase separation  
157 based solely on  $T_{\theta}$ , it is possible our computational framework can distinguish sequences such as  $\Delta 21-30$   
158 which have more significant changes to LLPS behavior, but cannot capture smaller changes as with the  
159 other sequences.

160 We then tested these predictions experimentally by recombinantly expressing and purifying RGG  
161 and its variants (Fig. S1C, S1D). To study protein phase behavior, we used a temperature-dependent  
162 turbidity assay, in which protein solutions are cooled from above to below their phase transition  
163 temperature. Proteins transition from well-mixed to demixed upon cooling below the saturation temperature  
164 ( $T_{\text{sat}}$ ), defined as the point where we first observe an increase in the measured solution turbidity from that  
165 of the well-mixed solution. WT RGG and the deletion variants all exhibited upper-critical solution  
166 temperature phase behavior, becoming turbid upon cooling (Fig. 1D, S2A), characteristic of IDPs rich in  
167 polar and charged amino acids<sup>18,41</sup>. Under these experimental conditions, the  $T_{\text{sat}}$  of WT RGG is  
168 approximately 26 °C, whereas the variant with the sticky hydrophobic subregion deleted ( $\Delta 21-30$ ) has a  
169 phase transition temperature of only approximately 14 °C, representing a decrease of 12 °C. We tested two  
170 additional deletion variants, the first having residues 101-110 deleted ( $\Delta 101-110$ ) which displayed the  
171 highest  $T_{\theta}$  value according to simulations (Fig. 1C), and a control sequence having residues 82-91 deleted  
172 ( $\Delta 82-91$ ), which contains the same number of arginine and tyrosine residues as  $\Delta 21-30$ . Both of these  
173 display a more modest reduction of  $T_{\text{sat}}$ , by roughly 6 °C. These results indicate that the eIF4E-binding motif  
174 has the effect of promoting phase separation of the LAF-1 RGG domain, in addition to its specific binding

175 function.

176 We then assessed whether the turbidity was due to the formation of spherical droplets, a hallmark  
177 of LLPS. We employed an optical microscope equipped with a temperature controller capable of rapidly  
178 setting the sample temperature to above or below room temperature. Indeed, we observed that both WT  
179 and the deletion variants of RGG assembled into spherical droplets below their respective values of  $T_{\text{sat}}$ . At  
180 low temperature (5 °C),  $\Delta 21-30$ , and the control deletions formed micrometer-scale liquid droplets that were  
181 morphologically indistinguishable from those formed by WT RGG (Fig. 1E). Notably,  $\Delta 21-30$  droplets  
182 dissolved within 1 minute upon increasing the sample temperature from 5 °C to 25 °C, whereas  $\Delta 82-91$   
183 and WT RGG exhibited slower and incomplete droplet dissolution at 25 °C, requiring a temperature of 37  
184 °C to rapidly and fully dissolve (Fig. 1E). In all cases, the process was reversible in that droplets were able  
185 to assemble, disassemble, and reassemble upon cycling the temperature (Fig. S3). Thus, both the  
186 macroscopic turbidity assays and microscopy confirmed that purified  $\Delta 21-30$  phase separates, but with  
187 significantly reduced phase separation propensity as compared to WT RGG and the other deletion variants.

188 Finally, we assessed the effect of these deletions on the phase behavior of LAF-1 in living cells.  
189 For these experiments, we selected *S. cerevisiae*, a well-established model for studying protein  
190 aggregation<sup>42,43</sup>, and we used full-length GFP-tagged LAF-1 (Fig. 1F). At room temperature, we observed  
191 multiple bright cytoplasmic puncta in cells expressing WT LAF-1, whereas we observed only delocalized  
192 cytoplasmic fluorescence for LAF-1  $\Delta 21-30$  (Fig. 1G). We confirmed by western blot that WT LAF-1 and  
193 LAF-1  $\Delta 21-30$  expressed at similar levels (Fig. S1E). The full-length  $\Delta 21-30$  variant rapidly formed  
194 fluorescent cytoplasmic puncta when cooled to 5 °C, which then rapidly dispersed at 25 °C (Fig. 1H). This  
195 suggests that residues 21-30 are indeed important for phase separation of full-length LAF-1 in living cells,  
196 with their deletion resulting in LAF-1 having a reduced propensity to phase separate. While deletion of this  
197 region would also likely impact the interactions of LAF-1 with eIF4E, the appreciable difference observed  
198 in the simulations and *in vitro* experiments – which do not incorporate the eIF4E protein – indicate that the  
199 eIF4E-binding motif itself is contributing to phase separation. It will be interesting to consider in the future  
200 how the position of the eIF4E binding region within the disordered LAF-1 RGG domain, in the context of  
201 the full-length protein, may affect its phase behavior and function.

202 In total, our *in vitro* and *in vivo* results suggest that LAF-1 phase separation is driven by multivalent

203 interactions in addition to strong interactions with the more hydrophobic eIF4E-binding motif. Although this  
204 10 amino acid motif is necessary, it is not sufficient to control RGG phase separation, and therefore we  
205 sought additional sequence determinants.

206

## 207 **Charge distribution and sequence shuffling can be used to control LLPS**

208 We next sought to understand how the patterning of amino acids can influence the phase  
209 separation of LAF-1 RGG, as has been studied previously for other proteins<sup>44,45</sup>, and the joint contributions  
210 of charge-charge interactions and the sticky hydrophobic subregion. We constructed one set of sequences  
211 having identical amino acid composition to WT RGG, but with the full sequence randomly shuffled, and a  
212 second set in which the eIF4E-binding motif (residues 21-28) was preserved. To quantify the extent to  
213 which we can expect the sequences to differ, we calculated the sequence charge decoration (SCD)  
214 parameter, where a more negative SCD score indicates greater charge segregation for sequences with  
215 many positive and negative charges. SCD has been shown to be correlated with disordered proteins' radii  
216 of gyration ( $R_g$ )<sup>46</sup>, and with their critical temperatures ( $T_c$ )<sup>44</sup>.

217 To observe the accessible SCD space of polypeptides having the same composition as the LAF-1  
218 RGG domain, we generated 1 million randomly shuffled sequences of LAF-1 RGG and plotted the  
219 probability distribution of SCD (Fig. 2A). We find that randomly shuffled sequences tend to populate a very  
220 small window of SCD values, with 93.6% of the shuffled sequences having SCD scores between -2 and  
221 0.5. For comparison, the minimum possible value for a sequence of the same length and composition  
222 is -28.03, when following the constraints set by experimental procedures (Supporting Methods). Notably,  
223 the WT RGG sequence does not sit at the center of the distribution, but rather, its SCD (0.565) is in the  
224 highest 2% of the million randomly generated sequences. This is in contrast to the IDRs of similar helicase  
225 proteins such as DDX4, which is more charge-segregated<sup>47</sup>, having an SCD value of -1.02. Charge  
226 patterning could perhaps regulate phase separation *in vivo* such that the saturation concentration of LAF-  
227 1 is similar to that of the native expression level, and also make it distinguishable from other proteins of  
228 similar amino acid composition<sup>48</sup>.

229 We selected the sequence with the lowest SCD value, termed RGG<sub>shuf</sub>. We did the same for  
230 sequences having the eIF4E-binding motif preserved (RGG<sub>shuf-pres</sub>), to test whether there is an appreciable

231 difference between charge-segregated variants with and without the presence of a sticky hydrophobic  
232 subregion. The two sequences are depicted in Fig. 2B, which shows that both have an abundance of anionic  
233 residues in the first half of the sequence, and an abundance of cationic residues in the second half, in  
234 contrast with the WT sequence, which has a relatively even distribution of cationic and anionic residues  
235 throughout. We conducted CG molecular simulations for these sequences and determined the phase  
236 diagrams as a function of temperature. Both shuffled sequences show a drastic increase in the critical  
237 temperature compared to WT (Fig. 2C), as well as compaction in single-chain simulations (Fig. S4).  
238 Interestingly, RGG<sub>shuf</sub> does not exhibit as large of an upward shift in  $T_c$  as does RGG<sub>shuf-pres</sub>, even though it  
239 has a slightly lower SCD value. This indicates that charge patterning is capable of inducing large shifts to  
240 the phase diagram, but a combination of charge segregation and preservation of the hydrophobic subregion  
241 promotes LLPS even more.

242 We then tested these predictions experimentally by conducting temperature-dependent turbidity  
243 assays on recombinantly expressed and purified WT RGG, RGG<sub>shuf</sub>, and RGG<sub>shuf-pres</sub>. These experiments  
244 were performed using lower concentrations (0.3 mg/mL) of protein because the two shuffled variants display  
245 a much greater propensity to phase separate (Fig. 2D, S2B). Remarkably, whereas WT RGG undergoes  
246 LLPS at approximately 15°C under these conditions, RGG<sub>shuf</sub> demixed at 42°C, and RGG<sub>shuf-pres</sub> demixed  
247 at 52°C. We observed a lower  $T_{sat}$  for WT RGG here compared to Fig. 1D due to the need for reduced  
248 protein concentration in the case of the shuffled sequences. This finding nicely agrees with our  
249 computational results, which showed that increasing the charge segregation in combination with preserving  
250 the eIF4E-binding motif enhances self-association propensity more than simply increasing charge  
251 segregation. Importantly, despite such drastic rearrangement of the protein sequence, both RGG<sub>shuf</sub> and  
252 RGG<sub>shuf-pres</sub> formed spherical liquid droplets of normal morphology, as imaged by brightfield microscopy at  
253 room temperature (Fig. 2D insets).

254 To determine whether altering the charge patterning of the RGG sequence has any unexpected  
255 consequences in vivo, we then tested RGG<sub>shuf</sub> in the context of full-length LAF-1 in live yeast cells. LAF-1  
256 in which the RGG domain was replaced with RGG<sub>shuf</sub> (RGG<sub>shuf</sub>-LAF-1) appeared to localize to the nucleus,  
257 with a single fluorescent punctum per cell (Fig. 2E). This is perhaps unsurprising, as nuclear localization  
258 signals characteristically contain stretches of basic amino acids<sup>49,50</sup>. We, therefore, tagged RGG<sub>shuf</sub>-LAF1

259 with a nuclear export signal (NES), which upon expression, generated cytoplasmic puncta, thus  
260 demonstrating that RGG<sub>shuf</sub> is capable of self-assembling in living cells. Together, these experimental  
261 results support the computational predictions that charge patterning is a critical determinant of LAF-1 RGG  
262 phase separation and that this effect can be supplemented by the incorporation of small patches of  
263 hydrophobic amino acids. We were unable to conduct the same experiments on RGG<sub>shuf-pres</sub> due to its poor  
264 expression in yeast cells.

265

### 266 **Arginine and tyrosine are important determinants for LLPS of LAF-1 RGG**

267 Interactions of tyrosine and arginine can be critically important to protein LLPS<sup>30,32,51</sup>. The LAF-1  
268 RGG domain contains 24 arginine, 11 tyrosine, and 1 phenylalanine and no lysine residues, which are  
269 relatively evenly distributed across the 168 residue-long domain (Fig. 3A). To test the role of these residues  
270 in RGG phase separation, in one construct, we mutated all tyrosines to phenylalanine (Y→F), except for a  
271 single tyrosine that was mutated to tryptophan to facilitate spectrophotometric detection. In a second  
272 construct, we mutated all arginines to lysines (R→K). We then conducted turbidity assays (at 1 mg/mL  
273 protein concentration, since the mutations were likely to reduce LLPS propensity) on both constructs.

274 In contrast to WT RGG, which demixed at approximately 26 °C, mutating the tyrosines to  
275 phenylalanines lowered transition temperature to approximately 14 °C (Fig. 3B, S2C). To confirm that the  
276 Y→F mutant still forms normal protein droplets, we imaged it with brightfield microscopy at 5 °C. We  
277 observed that the condensates appeared morphologically identical to WT RGG, with many micrometer-  
278 scale protein droplets (Fig. 3B, insets). Even more dramatically, upon mutating all arginines to lysines, we  
279 observed no phase separation, even below 5 °C (Fig. 3B, S2C). The R→K mutant was soluble and did not  
280 assemble into protein droplets even under experimental conditions that promote RGG phase separation,  
281 including high protein concentration and low salt concentration at low temperature. Thus, the presence of  
282 tyrosine and arginine plays a key role in phase separation of the LAF-1 RGG domain, in agreement with  
283 studies on FUS<sup>30</sup>.

284 These experimental results suggest that the Y→F and R→K mutations have a significant impact  
285 on the overall interactions occurring between LAF-1 RGG molecules. To gain mechanistic insight into these  
286 changes, we turned to all-atom simulations with explicit solvent, which can provide highly detailed

287 information on the different types of interactions in which each amino acid may participate<sup>35</sup>. Since it is  
288 currently impractical to faithfully sample the configurational ensemble of a long IDP like LAF-1 using such  
289 high-resolution models, we conduct simulations on a 44-residue region of the LAF-1 RGG domain spanning  
290 residues 106-149 (RGG<sub>106-149</sub>). This particular contiguous region was selected to provide the highest  
291 compositional similarity with the full RGG domain so that the information obtained is most consistent with  
292 the expectations for the full-length sequence (Fig. S5). We also simulate two variants in which either all the  
293 tyrosine residues are mutated to phenylalanine (Y→F RGG<sub>106-149</sub>) or all the arginine residues are mutated  
294 to lysine (R→K RGG<sub>106-149</sub>). From single-chain simulations, we find we find that  $R_g$  increases in the following  
295 order: WT < Y→F < R→K (Fig. 3C). Previous studies provide compelling evidence that chain dimensions  
296 or solvent quality can faithfully provide knowledge on protein LLPS<sup>3,40,44,52</sup> – more collapsed chains are  
297 expected to be more prone to phase separation. Therefore, the trend in  $R_g$  from all-atom simulations is  
298 consistent with the experimental LLPS behavior that we observe for these mutants (Fig. 3B), which provides  
299 further confidence in utilizing these simulations to understand the molecular interactions responsible for the  
300 experimental results.

301 To observe intermolecular interactions and self-association, we conducted simulations of two  
302 RGG<sub>106-149</sub> chains. Consistent with our recent work on the FUS LC domain<sup>35</sup>, we use well-tempered  
303 metadynamics with the number of intermolecular Van der Waals (VDW) contacts as a pertinent collective  
304 variable to enhance sampling of intermolecular contacts between the two peptides. The resulting free  
305 energy surfaces as a function of the number of intermolecular VDW contacts are shown in Fig. S5A. Both  
306 WT and Y→F peptides show free energy minima at a finite number of VDW contacts. Interestingly, the  
307 R→K variant has a global minimum at zero contacts, suggesting the two chains do not interact as is  
308 consistent with the lack of phase separation in the experiments.

309 Previous work has suggested the importance of cation- $\pi$  interactions<sup>30,53</sup>, particularly between  
310 arginine and tyrosine<sup>30</sup>; planar interactions between  $sp^2$  hybridized groups (referred to here as  $sp^2/\pi$   
311 interactions)<sup>54</sup>; electrostatic interactions<sup>16,55</sup>; and hydrophobic and VDW interactions<sup>35</sup> to LLPS. We  
312 calculate the average number of intermolecular contacts between the two chains of the different RGG<sub>106-149</sub>  
313 variants (Fig. 3D). In general, WT and Y→F have a much higher number of contacts than R→K, consistent  
314 with the free energy profiles, showing that R→K most favors unbound configurations. We also normalize



315 the average number of intermolecular contacts of each type by the average number of intermolecular VDW  
316 contacts (Fig. S6B) to understand the role of various interaction modes independent of the global contact  
317 propensity, which is different between these three variants. Additionally, we provide the unnormalized  
318 average number of various contacts formed by each residue (Fig. S7). The number of sp<sup>2</sup>/π and cation-π  
319 interactions is particularly decreased in R→K, while there is no significant difference between WT and Y→F  
320 average contacts. The overall number of contacts, however, may not consider the interaction strengths and  
321 thus would not perfectly describe the difference between WT and Y→F.

322 To further elucidate the differences between the mutants, we considered the effect of the  
323 interactions between cationic and aromatic sidechains which were the original target of these designed  
324 mutations. By analysis of all simulation snapshots in which arginine or lysine and tyrosine or phenylalanine  
325 residues from different chains are in contact (having at least one VDW contact between them), we  
326 calculated the probability of occurrence of different interaction types. Three different interaction modes are  
327 observed for arginine-tyrosine contacts, while only two are observed for arginine-phenylalanine and lysine-  
328 tyrosine contacts (Fig. 3E). Importantly, interactions between arginine-tyrosine sidechains promoting LLPS  
329 could be due to multiple modes of interactions with significant contributions from cation-π, hydrogen  
330 bonding, and sp<sup>2</sup>/π interactions. The Y→F mutations reduce the extent of these interactions, likely due to  
331 the loss of hydrogen bonding interactions, as phenylalanine sidechain lacks a hydroxyl group, unlike  
332 tyrosine. On the other hand, R→K mutations remove sp<sup>2</sup>/π interactions due to the removal of the guanidine  
333 group present in arginine. These results provide a much-needed mechanistic understanding of the  
334 importance of arginine and tyrosine residues to protein LLPS.

335

### 336 **Sequence perturbations result in shifts to phase diagram**

337 To more completely map the experimental phase behavior of variants of the LAF-1 RGG domain,  
338 we performed temperature-dependent turbidimetry at varying protein concentrations and calculated T<sub>sat</sub> for  
339 each to obtain the low-concentration arm of their phase diagrams. We find that all variants for which we  
340 were able to acquire multiple T<sub>sat</sub> values display a UCST phase diagram, having a region of miscibility at  
341 high temperatures and phase separation at low temperatures. By imposing different perturbations to the  
342 RGG sequence, we were able to shift the phase diagram upward (Fig. 4A) or downward (Fig. 4B). A



343 significant increase of LLPS propensity occurs when modifying the sequence such that most cations are  
344 localized to one side and anions on the other side, even when the sticky hydrophobic region we identified  
345 is lost in the shuffling. We find that designing a shuffled sequence that conserves this region (such  
346 conservation has occurred across different organisms) results in the greatest upward shift of the phase  
347 diagram (Fig. 4A), indicating that both of these types of molecular interactions control phase separation of  
348 RGG.

349 We are also able to shift the phase diagram downward, thus making LLPS less favorable. When  
350 deleting residues 21-30, encompassing the eIF4E-binding motif, we find that the phase diagram shifts  
351 downward significantly (Fig. 4B), much more so than when deleting other regions of 10 residues (Fig. S8).  
352 This also validates the predictions of the computational model, which identified the enhanced interactions  
353 within that region. Mutations of all arginine to lysine result in total loss of LLPS behavior at tested conditions.  
354 We suggest the phase diagram has been shifted downward enough that the temperatures or concentrations  
355 required to observe LLPS are not practically achievable in vitro (Fig. 4B).

356 In previous work, Wang et al. suggest that the saturation concentration ( $c_{sat}$ ) of a protein may be  
357 predicted by counting the number of tyrosine and arginine residues within the sequence as  $c_{sat} =$   
358  $k(n_{Tyr}n_{Arg})^{-1}$  where  $k$  is a fitting parameter and is equal to  $6.5 \text{ mM}^{30}$ . For the WT RGG sequence, this  
359 predicts a saturation concentration of  $24.6 \text{ }\mu\text{M}$  or  $0.439 \text{ mg/mL}$ , which also applies to  $\text{RGG}_{shuf}$  and  $\text{RGG}_{shuf-}$   
360  $_{pres}$ , as they have an identical composition (Fig. 4C). For the  $\text{R}\rightarrow\text{K}$  and  $\text{Y}\rightarrow\text{F}$  variants, the denominator  
361 becomes zero, so the predicted value is undefined, with the suggestion that  $c_{sat}$  is very high. Deletion of  
362 residues 21-30 removes 2 arginine, and 1 tyrosine residue, resulting in a small predicted increase of  $c_{sat}$  to  
363  $29.6 \text{ }\mu\text{M}$  or  $0.493 \text{ mg/mL}$ . To directly compare with results from this prediction, we calculated saturation  
364 concentration at  $23^\circ\text{C}$  using a logarithmic fit to turbidimetry data (Fig. S9A,B). Linear fits of the data yield  
365 similar  $c_{sat}$  values (Fig. S9C,D). We find that the equation  $c_{sat} = k(n_{Tyr}n_{Arg})^{-1}$  poorly predicts the  $c_{sat}$  for  
366  $\text{RGG}_{shuf}$  or  $\text{RGG}_{shuf-pres}$  (Fig 4C). Further, the prediction underestimates the effect of deletion of residues 21-  
367 30 from RGG. These results suggest that while the number of arginine and tyrosine residues can sometimes  
368 provide a reasonable estimate of  $c_{sat}$ , this parameter alone is not predictive, and many other factors, such  
369 as charge patterning and hydrophobic interactions, determine LLPS.

370

## 371 **Protein condensates formed from RGG variants retain liquid-like properties**

372 Thus far, we have demonstrated perturbations to the LAF-1 RGG sequence that alter its phase  
373 behavior, using molecular simulations to guide experiments and provide a mechanistic understanding of  
374 the driving forces of phase separation. We next wondered whether these sequence perturbations would  
375 alter the liquid properties of RGG protein condensates. This is important to understand because the  
376 material properties of biomolecular condensates are intertwined with their biological function<sup>56</sup>. The  
377 spherical morphologies of WT RGG and its sequence variants are characteristic of viscous liquids. For all  
378 variants, droplets could be seen contacting, fusing, and then rounding into larger spheres (Fig. 5A). To  
379 determine the liquidity of these droplets, we quantified fusion events, calculating the time  $\tau$  for the two  
380 coalescing droplets to relax to a sphere (Fig. S10A). WT RGG and all the variants examined (RGG $\Delta$ 21-  
381 30, both shuffled versions, and Y $\rightarrow$ F) exhibited rapid fusion, with droplets of lengthscale  $\ell = 2 \pm 0.25 \mu\text{m}$   
382 fusing with  $\tau < 100 \text{ ms}$  (Fig. 5B). Droplet fusion is driven by surface tension  $\gamma$  and slowed by viscosity  $\eta$ ,  
383 and the timescale of fusion is also proportional to droplet size  $\ell$ , so  $\tau \approx \frac{\eta}{\gamma} \ell$ <sup>6,7,57</sup>. By plotting  $\tau$  against  $\ell$  for  
384 tens of droplet fusion events (Fig. 5C), we estimate the ratio  $\eta/\gamma$ , known as the inverse capillary velocity  
385 (Fig. S10B). All the variants tested had  $\eta/\gamma$  within 3-fold that of WT RGG, and in all cases  $\eta/\gamma < 0.05 \text{ s}/\mu\text{m}$ ,  
386 indicating faster fusion compared to LAF-1 ( $\eta/\gamma = 0.12 \text{ s}/\mu\text{m}$ )<sup>6</sup>.

387 In a complementary approach, we examined dynamics within the droplets through fluorescence  
388 recovery after photobleaching (FRAP). For all variants tested, 50% fluorescence recovery was achieved  
389 within 30 s of photobleaching a small circular region within a larger droplet (Fig. 5D,E). By fitting the  
390 FRAP recovery curves to a 3D infinite model, we find diffusion coefficients ranging from  $D = 0.01 \mu\text{m}^2/\text{s}$  to  
391  $0.025 \mu\text{m}^2/\text{s}$ , approximately one order of magnitude faster than that for full-length LAF-1<sup>58</sup>. There are  
392 modest differences, notably that the construct with deletion of residues 21-30 (ie lower  $T_{\text{sat}}$  than WT)  
393 exhibited faster fusion and FRAP recovery compared to that of RGG<sub>shuff-pres</sub> (ie highest  $T_{\text{sat}}$  of all  
394 constructs we tested). Together, the FRAP and fusion experiments demonstrate that these variants  
395 maintain dynamic, liquid-like condensates, despite the changes to sequence and phase behavior. Thus,  
396 phase behavior – critical concentration and transition temperature – can be modulated mostly  
397 independently from the alteration of droplet liquidity.

## 398 Discussion

399 In this work, we elucidate sequence determinants of IDP phase separation, and in so doing, we  
400 advance a computationally guided approach for rational engineering of protein LLPS. We focus on the RGG  
401 domain from LAF-1, a prototypical phase-separating protein of great interest to the LLPS field whose  
402 sequence-to-phase behavior relationship has not been mapped in detail previously. By combining  
403 predictive simulations and experiments, we identified three important features that govern the propensity  
404 of this protein to phase separate: a short conserved domain, charge patterning, and arginine-tyrosine  
405 interactions.

406 We first demonstrate that a small conserved domain plays an unexpectedly large role in LAF-1  
407 phase separation, such that the deletion of 10 residues encompassing the identified region decreases the  
408 protein's phase separation propensity significantly. Our computational data and in vitro experiments show  
409 that this region has an intrinsic affinity for itself. This contact-prone region coincides with the previously  
410 identified eIF4E-binding motif, although the contribution of this motif to LLPS is likely orthogonal to its  
411 specific binding function. Hypothetically, LLPS of LAF-1 might be particularly sensitive to stimuli that may  
412 target this region, such as phosphorylation-induced folding that may hide the motif and block its accessibility  
413 for self-association<sup>59</sup>. More generally, these results suggest that the presence within proteins of functional  
414 motifs, such as specific binding motifs<sup>38</sup>, may have a non-negligible effect on LLPS of the full sequence –  
415 even if the functional motif is only a small region in a much larger protein.

416 Second, our results support a revised view of the role of electrostatic interactions in LAF-1 RGG  
417 phase separation. Previous views pointed to electrostatic interactions and charge patterning as the driving  
418 force for LAF-1 phase separation<sup>6,13</sup>. On the contrary, we found that WT LAF-1 RGG has a well-mixed  
419 charge distribution. We, therefore, asked whether introducing charge patterning could enhance LAF-1  
420 phase separation. We used the SCD metric to identify shuffled versions of LAF-1 RGG having a high degree  
421 of charge segregation, and our CG simulations and experiments both show that such charge patterning  
422 results in significantly enhanced propensity to phase separate. Our results extend previous work on this  
423 topic<sup>44,45,60</sup>. Ddx4 features blocks of alternating net charge, and scrambling the blocks to remove charge  
424 patterning abolishes phase separation<sup>47</sup>. Relatedly, complex coacervation of the negatively charged  
425 Nephrin intracellular domain (NICD) with positively charged partners is promoted in part by blocks of high

426 charge density in NICD<sup>55</sup>. Theoretical work shows as well that block polyampholytes exhibit stronger  
427 interactions compared to charge-scattered polyampholytes, as the latter experience repulsion from nearby  
428 like charges<sup>44</sup>. Thus, it appears that WT RGG may be under negative selection to moderate this mode of  
429 blocky electrostatic interaction and maintain a well-mixed charge distribution.

430 Third, we find that distributed tyrosine and arginine residues are also important to the ability of LAF-  
431 1 RGG to phase separate, and we gain valuable mechanistic insight into this result from all-atom  
432 simulations. The importance of these particular residues was attributed in previous work to their propensity  
433 to form cation- $\pi$  interactions<sup>30,32,61</sup>. Our all-atom simulations confirm the presence of cation- $\pi$  interactions  
434 and, importantly, highlight other important interaction modes as well that change when mutating arginine to  
435 lysine or tyrosine to phenylalanine. Our simulations suggest that the loss of planar  $sp^2/\pi$  interaction<sup>54</sup> is  
436 likely responsible for reduced LLPS when mutating arginine to lysine. We note that arginine may be  
437 particularly prone to promoting LLPS with aromatic-rich sequences due to cooperative cation- $\pi$  and  $sp^2/\pi$   
438 interactions that co-occur. Another important interaction mode is hydrogen bonding, which has also recently  
439 been demonstrated to be important to LLPS<sup>35,37</sup> and is present in interactions between cationic residues  
440 and tyrosine. Our simulations suggest that the reduced LLPS propensity when mutating tyrosine to  
441 phenylalanine can be explained by the loss of sidechain hydrogen bonding, as phenylalanine lacks the  
442 hydroxyl group. Therefore, we suggest that while the selected mutations likely weaken cation- $\pi$   
443 interactions<sup>30,32</sup>, one must also consider the loss of several other types of interactions that are responsible  
444 for stabilizing the condensed liquid phase<sup>35</sup>.

445 The sequence perturbations investigated here significantly altered  $c_{\text{sat}}$  – for instance, approximately  
446 one order of magnitude decrease in  $c_{\text{sat}}$  for RGG<sub>shuff-pres</sub> compared to WT RGG, and approximately 5-fold  
447 increase for  $\Delta 21-30$ . Remarkably, we observed that the RGG variants retained their dynamic liquid material  
448 properties, even for a perturbation as drastic as shuffling the sequence. The significant changes in phase  
449 behavior would likely have important biological consequences, whereas the modest differences in droplet  
450 fluidity are likely of smaller functional significance. Thus, our experiments suggest that in a predictive  
451 manner, we can design mutations to an IDP to alter its phase behavior while retaining liquid-like condensate  
452 dynamics. Future work will continue to explore sequence-to-rheology relationships<sup>30</sup>.

453 Overall, our combined results elucidate the driving forces of LLPS and highlight how the sequence  
454 perturbations affect LLPS, promising a framework toward the rational design of LLPS-enabled IDPs. This  
455 work will inform studies into the biology of membraneless organelles, aberrant phase transitions in disease,  
456 and design of biomaterials and synthetic organelles.

457

## 458 **Methods**

### 459 **Cloning**

460 The WT, full-length LAF-1 gene was a gift of Shana Elbaum-Garfinkle and Clifford Brangwynne.  
461 WT RGG was amplified by PCR from LAF-1. All modified versions of the RGG domain were ordered as  
462 synthetic double-stranded DNA fragments (gBlocks; IDT). Plasmids were constructed using either In-  
463 Fusion cloning (Takara Bio) or NEBuilder HiFi DNA Assembly (New England BioLabs). For bacterial  
464 expression, genes were cloned into a pET vector in-frame with a C-terminal 6xHis-tag. For yeast  
465 expression, genes were cloned into the YIplac211 vector in frame with a C-terminal mEGFP (monomeric  
466 enhanced GFP) tag. YIplac211 is a yeast integrating plasmid with a URA3 marker<sup>62</sup>. Gene sequences were  
467 verified by Sanger sequencing (GENEWIZ).

468

### 469 **Protein expression and purification**

470 For bacterial expression, plasmids were transformed into BL21(DE3) competent *E. coli* (New  
471 England BioLabs). Colonies picked from fresh plates were grown for 8 h at 37 °C in 1 mL LB + 1% glucose  
472 while shaking at 250 rpm. This starter culture (0.5 mL) was then used to inoculate 0.5 L cultures. Cultures  
473 were grown overnight in 2L baffled flasks in Terrific Broth auto-induction medium (Formedium;  
474 supplemented with 4 g/L glycerol) at 37 °C while shaking at 250 rpm. The pET vectors used contained a  
475 kanamycin resistance gene; kanamycin was used at concentrations of 50 µg/mL in starter cultures and 100  
476 µg/mL in the auto-induction medium<sup>63</sup>. After overnight expression, bacterial cells were pelleted by  
477 centrifugation. Pellets were resuspended in lysis buffer (1 M NaCl, 20 mM Tris, 20 mM imidazole, Roche  
478 EDTA-free protease inhibitor, pH 7.5) and lysed by sonication. Lysate was clarified by centrifugation at  
479 15,000 g for 30-60 minutes. Lysis was conducted on ice, but other steps were conducted at room

480 temperature to prevent phase separation. Proteins were purified using an AKTA FPLC with 1 mL nickel-  
481 charged HisTrap columns (GE Healthcare Life Sciences) for affinity chromatography of the His-tagged  
482 proteins. The column was washed with 500 mM NaCl, 20 mM Tris, 20 mM imidazole, pH 7.5. Proteins were  
483 eluted with a linear gradient up to 500 mM NaCl, 20 mM Tris, 500 mM imidazole, pH 7.5. Proteins were  
484 dialyzed overnight using 7 kDa MWCO membranes (Slide-A-Lyzer G2, Thermo Fisher) into 500 mM NaCl,  
485 20 mM Tris, pH 7.5 or 150 mM NaCl, 20 mM Tris, pH 7.5. Proteins were dialyzed at temperatures (25 °C -  
486 42 °C) high enough to inhibit phase separation because phase-separated protein bound irreversibly to the  
487 dialysis membrane. Proteins were snap frozen in liquid N<sub>2</sub> in single-use aliquots and stored at -80 °C. For  
488 turbidity and microscopy experiments, protein samples were prepared as follows: Protein aliquots were  
489 thawed above the phase transition temperature. Proteins were then mixed with buffer (20 mM Tris, pH 7.5,  
490 0 – 150 mM NaCl) to obtain solutions containing the desired protein and NaCl concentrations. Protein  
491 concentrations were measured based on their absorbance at 280 nm using a Nanodrop spectrophotometer  
492 (ThermoFisher). Proteins were mixed in a 1:1 ratio with 8 M urea to prevent phase separation during  
493 concentration measurements.

494

### 495 **MALDI-TOF mass spectrometry**

496 Molecular weights of purified proteins were measured by matrix-assisted laser  
497 desorption/ionization time-of-flight (MALDI-TOF) mass spectrometry on an Ultraflex extreme mass  
498 spectrometer (Bruker). Protein samples were applied as spots to an MPT 384 polished steel target plate.  
499 Spots consisted of 1 µL protein solution (approximately 10 µM protein in 50 mM NaCl) plus 1 µL matrix  
500 solution (10 mg/mL sinapinic acid dissolved in a 50:50 acetonitrile:water mixture with 0.1% trifluoroacetic  
501 acid added).

502

### 503 **Turbidity assays**

504 Temperature-dependent turbidity assays were conducted using a UV-Vis spectrophotometer (Cary  
505 100 Bio; Agilent) equipped with a multicell Peltier temperature controller. Protein samples were assayed in  
506 quartz cuvettes with 1 cm path length (Thorlabs). Samples were first equilibrated above the phase transition

507 temperature (25-60 °C depending on the sample) and blanked. Then, the samples were cooled at a rate of  
508 1 °C per minute until reaching 2 °C. Absorbance was measured at  $\lambda = 600$  nm every 0.5 °C throughout the  
509 temperature ramp. Upon cooling below the phase transition temperature, the samples changed from clear  
510 to turbid.

511

## 512 **SDS-PAGE and western blot**

513 For chromatographically purified proteins, SDS-PAGE was run using NuPAGE 4-12% Bis-Tris gels  
514 (Invitrogen) and stained using a Coomassie stain (SimplyBlue SafeStain; Invitrogen). For western blotting,  
515 yeast cells were lysed as follows<sup>64</sup>: Cell cultures were pretreated with 2 M lithium acetate for 5 minutes on  
516 ice, then with 0.4 M NaOH for 5 minutes on ice. The cell cultures were then resuspended in SDS sample  
517 buffer, heated at 95 °C for 5 minutes, and centrifuged to remove cell debris. The supernatant was stored at  
518 -80 °C until use. The supernatant was run on a Novex 10% Tris-Glycine gel, WedgeWell format (Invitrogen),  
519 then transferred to a nitrocellulose membrane (0.2  $\mu$ m pore size). The membrane was then incubated with  
520 two primary antibodies: rabbit polyclonal antibody to GFP (Invitrogen, catalog #A11122) for detection of the  
521 GFP-tagged LAF-1 constructs, and mouse monoclonal antibody to PGK1 (Invitrogen, catalog #459250) as  
522 a loading control. Secondary antibodies used for detection were IRDye 680RD goat anti-rabbit IgG (LI-  
523 COR, catalog #926-68071) and IRDye 800CW goat anti-mouse IgG (LI-COR, catalog #926-32210). Blots  
524 were visualized on a LI-COR Odyssey CLx infrared imaging system.

525

## 526 **Yeast transformation and yeast cultures**

527 YIplac211 plasmids were prepared for yeast chromosomal integration by restriction digest with  
528 EcoRV, which cuts in the URA3 marker. Linearized plasmids were transformed into *S. cerevisiae* YEF473A  
529 strain<sup>65</sup> using the Frozen-EZ Yeast Transformation II Kit (Zymo Research). Transformed yeast cells were  
530 cultured at 30°C in uracil dropout synthetic defined medium (-Ura dropout supplement was purchased from  
531 Takara Bio). To induce expression of genes under the control of the GAL1 promoter, yeast cultures were  
532 first grown overnight in dropout medium + 2% glucose, then grown for 8-10 hours in dropout medium + 2%  
533 raffinose, and finally grown overnight in dropout medium + 2% galactose with a target OD<sub>600</sub> = 0.3 – 0.5 for  
534 imaging.



## 535 **Microscopy: phase behavior, FRAP, and fusion**

536 Imaging of temperature-dependent phase behavior in vitro and in yeast was performed on an  
537 Olympus IX81 inverted microscope equipped with a Yokogawa CSU-X1 spinning disk confocal unit and an  
538 iXon3 EMCCD camera (Andor). The microscope stage was outfitted with a Cherry Temp microfluidic  
539 temperature controller (Cherry Biotech), which enabled imaging samples over the temperature range 5 to  
540 42 °C, with rapid switching (approximately 10 s) between temperature extremes. Imaging was conducted  
541 with a 100x/1.4 NA plan-apochromatic oil-immersion objective.

542 FRAP experiments were performed on a Zeiss Axio Observer 7 inverted microscope equipped with  
543 an LSM900 laser scanning confocal module and a 63x/1.4 NA plan-apochromatic oil-immersion objective.  
544 LAF-1 RGG and its variants were mixed with 5% of RGG-GFP-RGG, which partitions into the RGG droplets  
545 and serves as a FRAP probe<sup>21</sup>. GFP was imaged with a 488 nm laser and bleached with a 405 nm laser.  
546 Circular bleach regions of approximate radius  $R = 1.5 \mu\text{m}$  were drawn in the center of protein droplets  
547 whose radii were at least  $2.5R$ . Recovery curves were fit to an infinite boundary model in three dimensions  
548 to calculate the recovery timescale  $\tau$ <sup>58</sup>. The diffusion coefficient was calculated as  $D = R^2/\tau$ . The same Zeiss  
549 microscope was used for droplet fusion experiments, but using brightfield transillumination and imaging  
550 onto an AxioCam 702 sCMOS camera at a frame rate of approximately 62 Hz. Droplet fusion was analyzed  
551 by first fitting the image of the fusing droplets to an ellipse and calculating the aspect ratio of the ellipse.  
552 The aspect ratio was then plotted against time and the decreasing portion of the curve was fit to an  
553 exponential decay to calculate the relaxation time<sup>7,27,57</sup>. The droplet length scale was defined as the radius  
554 of the droplet after completion of fusion, when the merged droplet was circular (aspect ratio 1). FRAP and  
555 droplet fusion experiments were conducted at room temperature of 16-18 °C using protein concentrations  
556 above  $c_{\text{sat}}$  at that temperature. Image analysis and data processing were performed in MATLAB.

557 All other imaging was performed on a Leica DMI8 inverted microscope equipped with a spinning  
558 disk confocal unit (Spectral Applied Research) and an sCMOS camera (Orca Flash 4.0; Hamamatsu) using  
559 a 63x/1.4 NA or 100x/1.4 NA plan-apochromatic oil-immersion objective.

560 For imaging purified RGG proteins, the protein samples were placed in chambers on glass  
561 coverslips (#1.5 glass thickness) that had been passivated for >1 hr by incubation with 5% Pluronic F127  
562 (for FRAP and droplet fusion experiments) or bovine serum albumin. Coated coverslips were thoroughly



563 rinsed with buffer prior to the addition of RGG protein solutions. For imaging yeast, the glass surface was  
564 pretreated by incubation with 0.4 mg/mL concanavalin A (ConA; Sigma) for 5-10 minutes. After removing  
565 the ConA solution, yeast was pipetted into the imaging chamber and allowed to settle for several minutes  
566 before imaging.

567

## 568 **Coarse-grained simulations**

569 Coarse-grained simulations were conducted using an amino-acid-resolution model with 20 residue  
570 types to capture sequence specificity, having interactions based on relative hydrophathies of each amino  
571 acid. Each system was simulated at a range of temperatures using constant volume and temperature using  
572 a Langevin thermostat, following similar protocols to our previous work<sup>26</sup>. Simulations of phase coexistence  
573 were conducted using HOOMD-Blue v2.1.5 software package<sup>66</sup>.

574

## 575 **All-atom simulations**

576 Atomic-resolution simulations were conducted for systems containing either one or two copies of a  
577 44-residue fragment of the LAF-1 RGG domain (RGG<sub>106-149</sub>). Simulations were of 44-residue fragments as  
578 we have found this size to be computationally tractable for single- and two-chain simulations in the previous  
579 studies<sup>5,35</sup>. We selected residues 106-149 by calculating the overall sequence composition of all possible  
580 44-residue fragments and comparing them with the total composition of the 168-residue RGG domain (Fig.  
581 S5A). The region having the overall composition most similar to that of the full RGG domain was residues  
582 106-149. Notably, this fragment contains 6 arginine and 3 tyrosine residues constituting 13.6% and 6.8%  
583 of the 44-residue sequence, comparable to the 14.3% and 6.5% composition in the full RGG (Fig. S5B,C).

584 Simulations were conducted with either a single RGG<sub>106-149</sub> chain solvated in explicit water and  
585 ~100 mM NaCl or two chains at the same conditions. We used a modified version of the state-of-the-art  
586 Amber99SBws force field<sup>67</sup> with improved residue-specific dihedral corrections (unpublished), tip4p/2005  
587 water<sup>68</sup> and improved salt parameters from Luo and Roux<sup>69</sup>. To efficiently sample the configurational  
588 ensemble and contacts between amino acid residues, we employed enhanced sampling using parallel  
589 tempering in the well-tempered ensemble (PT-WTE) which couples replica exchange molecular dynamics  
590 (REMD)<sup>70</sup> and well-tempered metadynamics<sup>71</sup> applied to the total system energy to enhance fluctuations

591 and reduces the number of replicas required for good replica exchanges<sup>72</sup>. For two-chain simulations, we  
592 also applied a well-tempered metadynamics bias on the intermolecular VDW contacts between heavy  
593 nonpolar atoms (i.e.  $|q| < 0.25$ ) as we have done previously to improve sampling of binding and unbinding  
594 events<sup>35</sup>. Simulations were conducted using GROMACS 2016 software package<sup>73</sup> with PLUMED 2.4  
595 plugin<sup>74</sup>.

596 We calculated the free energy surface of the two-chain systems from the metadynamics bias using  
597 the built-in function (sum\_hills) in PLUMED, and an alternative time-independent method from Tiwary and  
598 Parrinello<sup>75</sup>, then subtract the difference between the two results to generate error bars for Fig. S6A.  
599 Contact propensities in all-atom two-chain PT-WTE simulations were reweighted based on free energy  
600 surface.

601 VDW contacts were considered as any two heavy atoms being within 6 Å of each other. Hydrogen  
602 bonds were considered as a donor atom and an acceptor atom being within 3 Å and the donor-hydrogen-  
603 acceptor angle being larger than 120°.  $sp^2/\pi$  interactions were calculated as presented by Vernon et al.<sup>54</sup>  
604 and considered as any two  $sp^2$ -hybridized groups having at least two pairs of atoms being within 4.9 Å and  
605 the angle between the normal axes of the two  $sp^2$ -planes being less than 60°. Cation- $\pi$  interactions were  
606 considered as a cationic atom being within 7 Å of the center of an aromatic ring and less than 60° from the  
607 normal axis of the  $\pi$  face. Salt bridges are considered as a cationic atom and an anionic atom being within  
608 6 Å of each other.

## 609 **Competing Interests**

611 The authors declare no competing interests.

612

## 613 **Author Contributions**

614 BSS, GLD, MCG, and JM conceived and designed research. BSS, FMK, AKR, CNJ, and AGS conducted  
615 experiments. GLD, WST, and RMR performed and analyzed simulations. BSS, DAH, MCG, and JM  
616 supervised research. BSS, GLD, and JM wrote manuscript.

617

## 618 **Acknowledgements**

619 We thank Erfei Bi, Kangji Wang, and James Shorter for yeast strains, reagents, and protocols, and Cliff  
620 Brangwynne and Shana Elbaum-Garfinkle for the full-length LAF-1 gene. We gratefully acknowledge  
621 Andrew Tsourkas for use of the temperature-controlled spectrophotometer, Hui Chen for assistance with  
622 western blotting, Ellen Reed for assistance with mass spectrometry, Xinyi Li for assistance with data  
623 analysis, and Nick Fawzi for helpful discussions. This work was supported by the U.S. Department of

624 Energy, Office of Science, Basic Energy Sciences awards DE-SC0007063 to D.H. (experiments) and DE-  
625 SC0013979 to J.M. (theory and simulation). We gratefully acknowledge the use of the high-performance  
626 computing capabilities of the Extreme Science and Engineering Discovery Environment (XSEDE), which  
627 is supported by NSF grant TG-MCB-120014, and the National Energy Research Scientific Computing  
628 Center, supported by the Office of Science of the U.S. Department of Energy under contract DE-AC02-  
629 05CH11231. B.S. received support from an NIH postdoctoral fellowship (F32GM119430). W.S.T. received  
630 support from a National Science Foundation Grant (1845734). M.G. acknowledges support from a  
631 National Science Foundation Superseed, NIH R01-EB028320, and Burroughs Wellcome Fund.

632

633

634

635

636

637 **Figures**

638

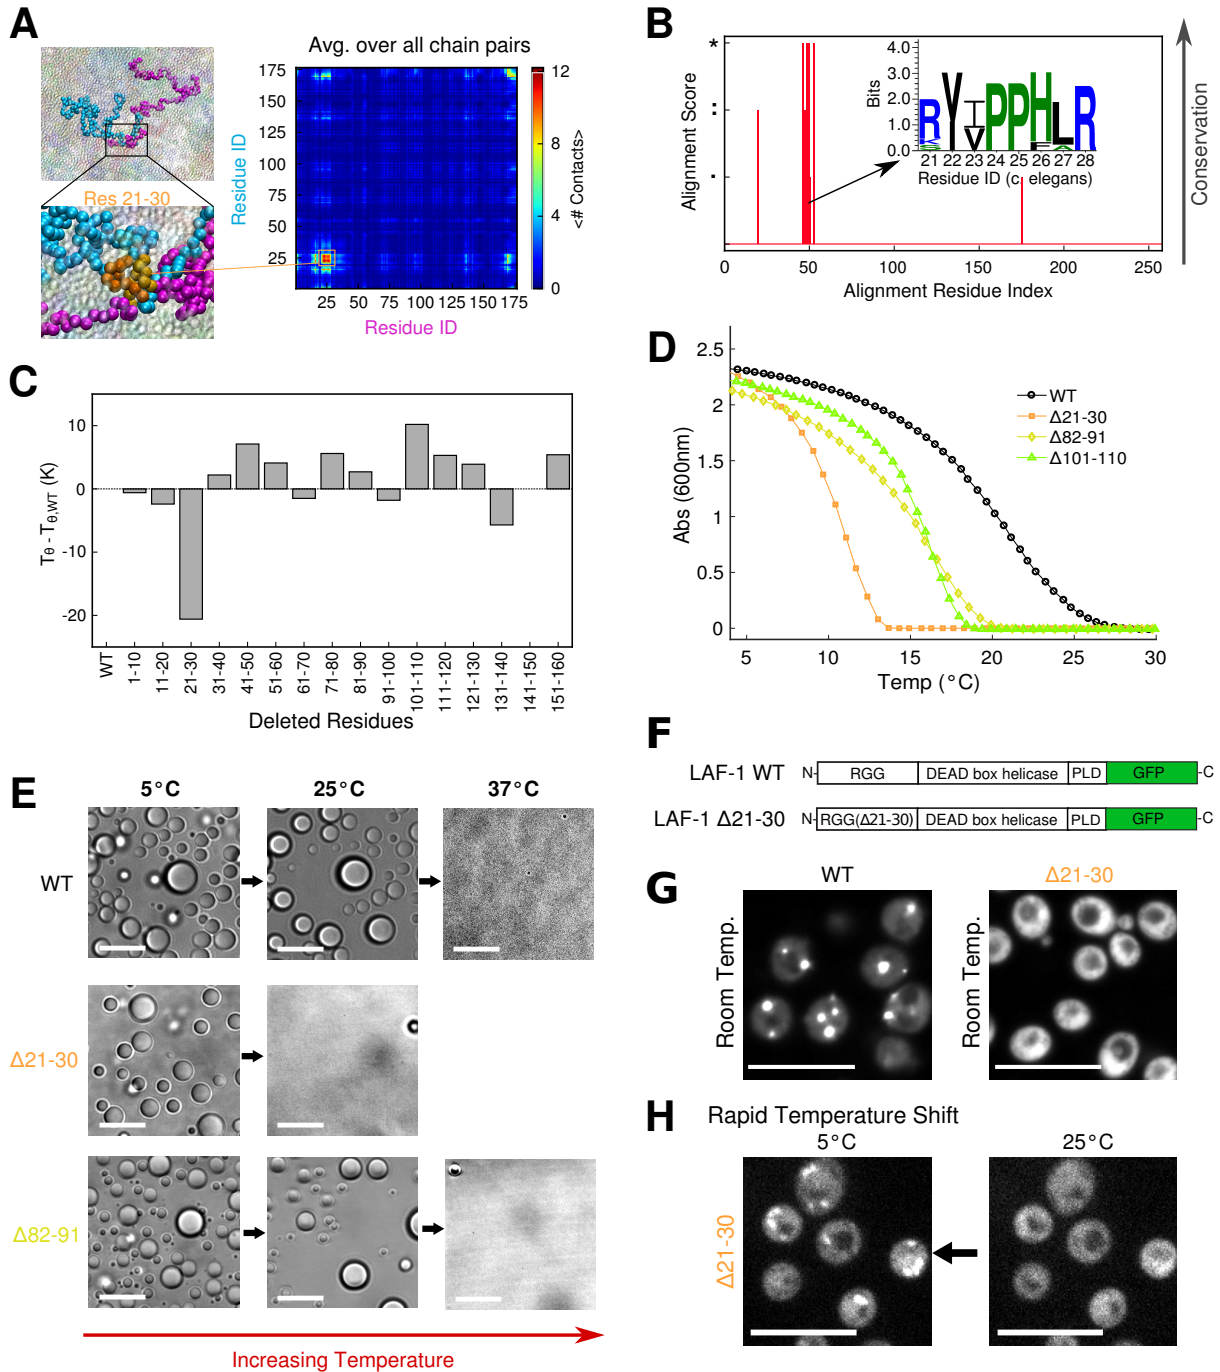

639

640

**Figure 1: A short segment of LAF-1 RGG is critical for phase separation:**

641

sequence-specific simulations of LAF-1 RGG highlight a small region where contact probability is

642

enhanced. Insets show the interaction of two protein chains and zoomed view of contacts between

643

residues within the contact-prone region. B) Sequence analysis of LAF-1 and some of its homologs

644 highlight high sequence conservation in the folded helicase domain, and poor conservation in the  
645 disordered RGG and prion-like domains (Fig. S1A). Within the RGG domain, we identify one short  
646 region having good conservation, which corresponds to the region highlighted by CG simulations. The  
647 amino acids within the sequence are displayed as an inset logo. C) Results of deleting 10 amino  
648 segments, scanning across the sequence of RGG;  $T_{\theta}$  from CG simulations. Errors are very small and  
649 would not show up well on the bar plot. D) Turbidity measurements show temperature-dependent  
650 phase behavior of WT RGG vs. variants with deletion of residues 21-30, 82-91, or 101-110. Proteins  
651 phase separate upon cooling from above to below the phase transition temperature. Protein  
652 concentrations were 1 mg/mL (approximately 60  $\mu$ M) in 150 mM NaCl buffer, pH 7.5. Data shown is  
653 representative of three independent turbidity experiments for each protein (Fig. S2). Similar to previous  
654 work<sup>18</sup>, we have not averaged the repeats, and therefore, we have not added error bars because the  
655 temperatures of the measurements from different replicates are not exactly the same. E) RGG  $\Delta$ 21-30  
656 and RGG  $\Delta$ 82-91 condense into spherical liquid droplets, similarly to WT RGG, as shown by brightfield  
657 microscopy. Upon heating from 5 °C, RGG  $\Delta$ 21-30 droplets dissolve at a lower temperature compared  
658 to WT or RGG  $\Delta$ 82-91. Protein concentration and buffer are the same as for turbidity assay. Scale  
659 bars: 10  $\mu$ m. F) Schematic for full-length LAF-1 constructs including C-terminal GFP fluorescent tag.  
660 (PLD: prion-like domain.) G) Full-length LAF-1 phase separates in yeast at room temperature, with  
661 multiple puncta per cell. In contrast, LAF-1  $\Delta$ 21-30 does not phase separate at room temperature;  
662 delocalized fluorescence in the cytoplasm is observed. H) Upon sufficient cooling, LAF-1  $\Delta$ 21-30 does  
663 exhibit phase separation in yeast: fluorescent condensates form rapidly upon cooling from 25 °C to 5  
664 °C, consistent with in vitro results in (D). Scale bars: 10  $\mu$ m.

665  
666

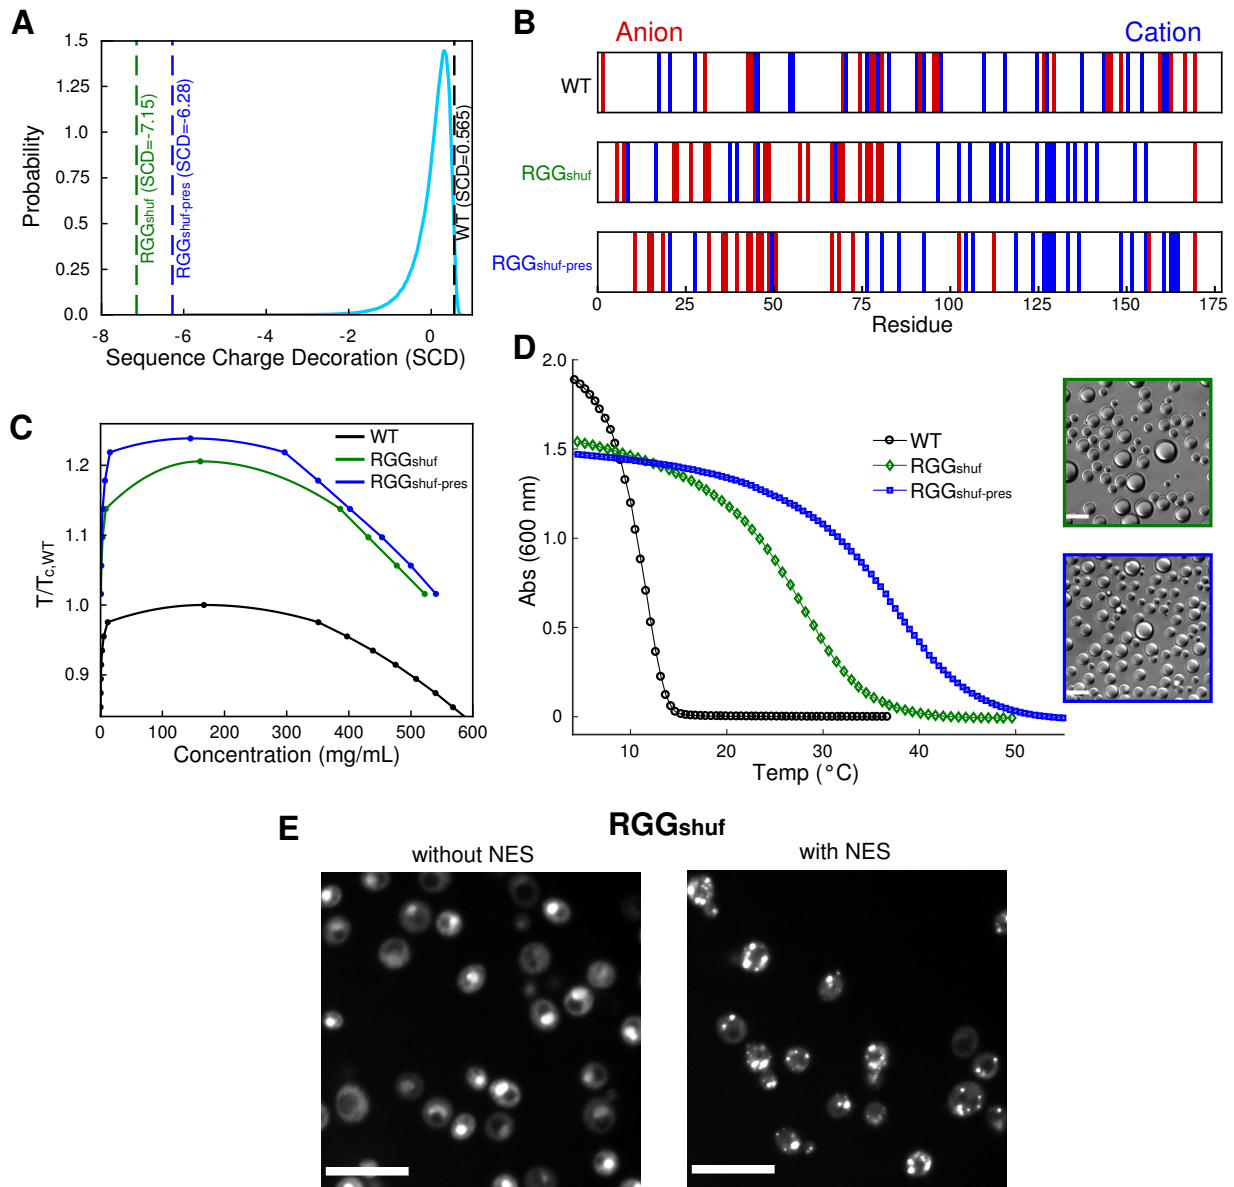

667

668 **Figure 2: Charge patterning alters LAF-1 RGG phase transition:** A) Probability distribution of

669 sequence charge decoration (SCD) values from 1 million random shuffles of LAF-1 RGG. SCD values

670 of WT, RGG<sub>shuf</sub>, and RGG<sub>shuf-pres</sub> are highlighted with dashed lines. B) Location of charged residues in

671 the three sequences. C) Phase diagrams of WT, RGG<sub>shuf</sub>, and RGG<sub>shuf-pres</sub> from CG simulations.

672 Temperatures are normalized to the critical temperature of WT RGG. Errors on the concentration

673 are smaller than symbols. D) Turbidity measurements show the temperature-dependent phase

674 behavior of WT RGG vs. RGG<sub>shuf</sub> and RGG<sub>shuf-pres</sub> variants. Data shown are representative of three

675 independent turbidity experiments for each protein (Fig. S2). Protein concentrations were 0.3 mg/mL  
676 (approximately 17  $\mu$ M) in 150 mM NaCl buffer, pH 7.5. Both RGG<sub>shuf</sub> and RGG<sub>shuf-pres</sub> exhibited phase  
677 transition temperatures markedly higher than that of WT RGG, and both appeared as liquid droplet  
678 condensates under optical microscopy at room temperature (insets; scale bars are 10  $\mu$ m). E) LAF-  
679 1<sub>shuf</sub>-GFP expression in yeast. Charge patterning leads to constitutive import. The addition of NES  
680 enables LAF-1<sub>shuf</sub>-GFP to be cytosolic, and this variant exhibits protein condensate formation. Scale  
681 bars: 10  $\mu$ m.

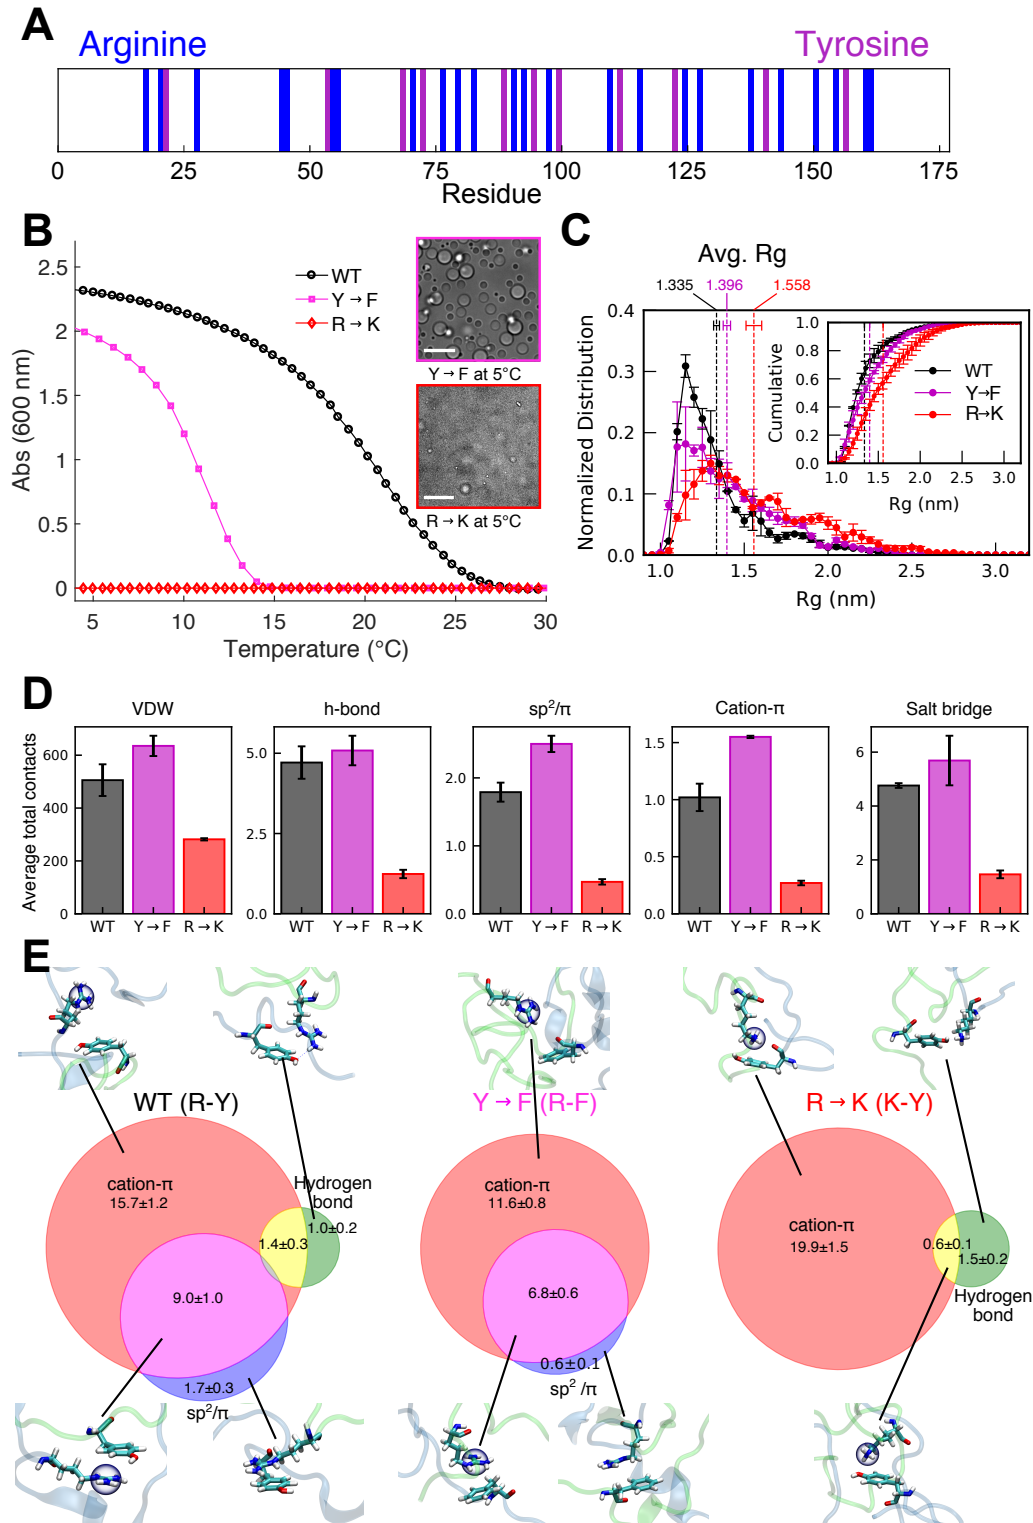

682  
683  
684

**Figure 3: Contribution of arginine and tyrosine residues to LLPS:** A) Arrangement of arginine and tyrosine residues along the RGG sequence. Residues are reasonably well-mixed with the exception

685



686 that the N-terminal end is relatively void of the two amino acids. B) Turbidity measurements show the  
687 temperature-dependent phase behavior of WT RGG vs. Y→F or R→K variants. Data shown are  
688 representative of three independent turbidity experiments for each protein (Fig. S2). For turbidity  
689 assays, protein concentrations were 1 mg/mL (approximately 60 μM) in 150 mM NaCl buffer, pH 7.5.  
690 The Y→F variant assembled into spherical liquid droplets (inset micrograph) at 5 °C. The R→K variant  
691 did not phase separate in the turbidity assay, nor were micrometer-scale protein liquid droplets visible  
692 by optical microscopy (bottom inset), even under conditions favorable for phase separation (6.6 mg/mL  
693 protein, 50 mM NaCl, pH 7.5, 5 °C). Scale bars: 10 μm. C) Normalized distribution of radius of gyration  
694 ( $R_g$ ) of RGG<sub>106-149</sub> fragments from single-chain simulations for WT, Y→F, and R→K variants. Inset  
695 shows cumulative histogram of  $R_g$ . D) Average number of intermolecular contacts observed between  
696 two chains of RGG<sub>106-149</sub> in two-chain simulations (see Methods), where the average is over the  
697 simulated ensemble. Backbone and sidechain heavy atoms are included in these calculations. E) Venn  
698 diagrams summarizing the interaction types driving the association of R/K and Y/F residues averaged  
699 over all instances of intermolecular VDW contact between any pair of these residues. The numbers  
700 represent the percentage and only sidechain heavy atoms are included in these calculations. The  
701 overlap between different interaction types shows that they may work cooperatively. WT has all three  
702 types of interaction, while R→K loses  $sp^2/\pi$  interactions, and Y→F loses hydrogen bonding. Snapshots  
703 show an instance of indicated contact type(s) from a two-chain simulation. For simulation data, error  
704 bars and uncertainty values are SEM with  $n = 2$ .

705

706

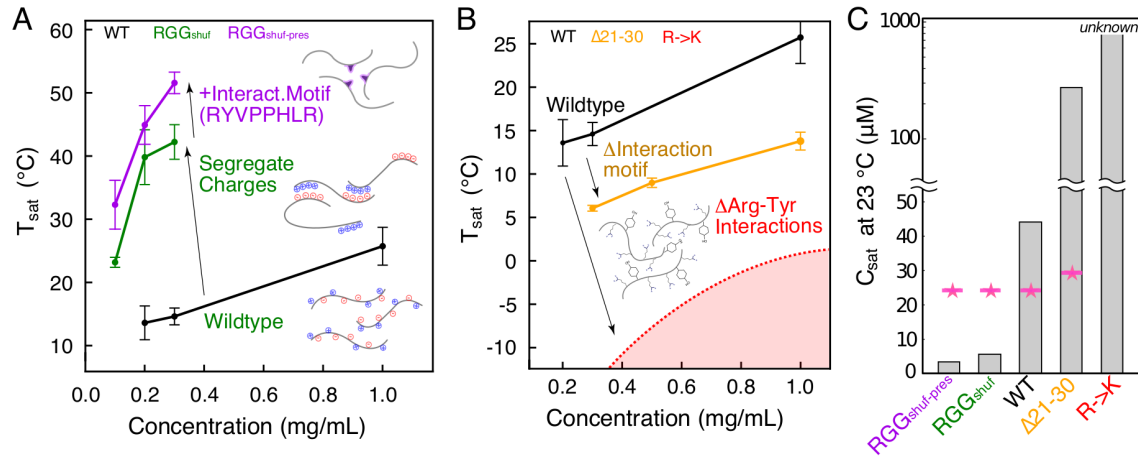

707

708

709

710

711

712

713

714

715

716

717

718

719

720

**Figure 4: Phase diagrams illustrate molecular interactions that underlie RGG LLPS:** Phase diagrams for different LAF-1 variants.  $T_{\text{sat}}$  values and associated error bars were calculated from triplicates of the turbidity assays at each concentration. A) Shuffled sequences with a high degree of charge patterning shift phase diagram upward, making phase separation occur at lower concentrations more easily. RGG<sub>shuf-pres</sub> features both charge segregation and the self-interaction motif at residues 21-28, allowing for even greater LLPS propensity. B) Deletion of the interaction motif, or mutation of arginine residues to lysine, both result in a drastic decrease of LLPS propensity and downward shift of the phase diagram. Phase diagram for R→K is theoretical and is meant strictly as a visual guide to show that this mutation has a stronger effect on LLPS than the deletion of the interaction motif.  $T_{\text{sat}}$  of WT,  $\Delta 21-30$ , RGG<sub>shuf</sub>, and RGG<sub>shuf-pres</sub> are all significantly different than one another ( $p < 0.005$ ), based on one-way ANOVA followed by Tukey's post-hoc test at 0.3 mg/mL. C) Saturation concentrations from turbidity experiments compared with predictions presented in ref<sup>30</sup>.

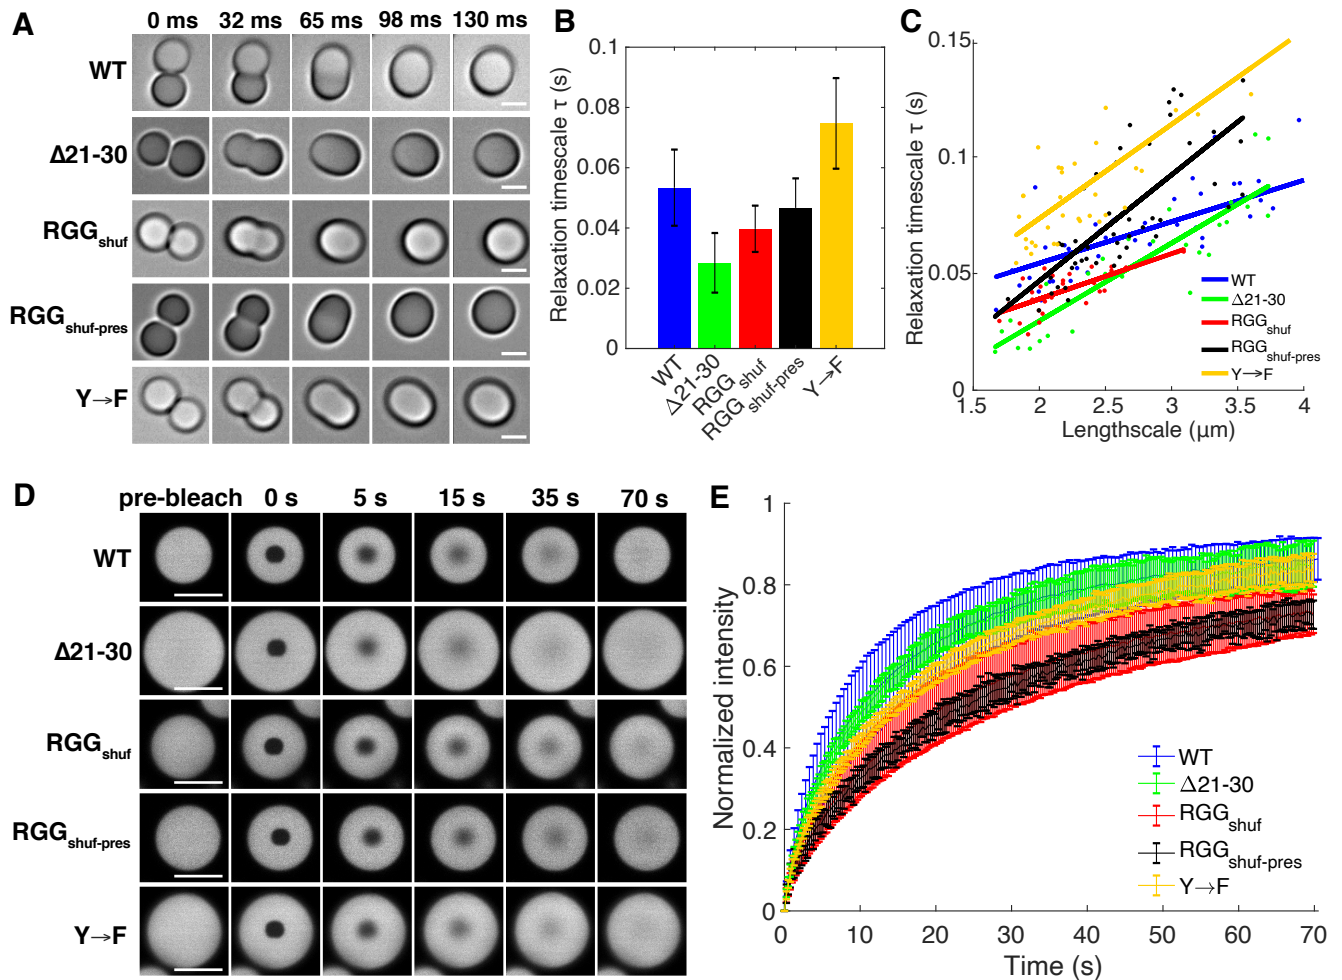

721  
 722 **Figure 5: RGG variants exhibit liquid-like material properties.** (A) Droplets fuse rapidly to form a single  
 723 larger sphere. Scale bars: 2  $\mu\text{m}$ . (B) The timescale of droplet fusion for droplets of lengthscale range 1.75-  
 724 2.25  $\mu\text{m}$ . Error bars represent STD ( $n \geq 9$ ). (C) Plots of relaxation timescale against length scale, which  
 725 allows determination of the inverse capillary velocity. (D) Representative images from FRAP experiments.  
 726 Scale bars: 5  $\mu\text{m}$ . (E) Normalized FRAP recovery curves show > 50% recovery within 30 s for all variants.  
 727 Error bars represent STD ( $n > 15$ ).

728  
 729  
 730  
 731  
 732  
 733  
 734

## 735 References

- 736 1. C. Brangwynne, C. Hoegge, J. Gharakhani, F. Jülicher, A. A. Hyman Germline P Granules Are  
737 Liquid Droplets That Localize by Controlled Dissolution/Condensation. *Science (80-. )*. **324**, 1729–  
738 1732 (2009).
- 739 2. Y. Shin, C. P. Brangwynne Liquid phase condensation in cell physiology and disease. *Science*  
740 (80-. ). **357**, eaaf4382 (2017).
- 741 3. J. A. Riback, et al. Stress-Triggered Phase Separation Is an Adaptive, Evolutionarily Tuned  
742 Response. *Cell* **168**, 1028–1040 (2017).
- 743 4. A. E. Conicella, G. H. Zerbe, J. Mittal, N. L. Fawzi ALS Mutations Disrupt Phase Separation  
744 Mediated by  $\alpha$ -Helical Structure in the TDP-43 Low-Complexity C-Terminal Domain. *Structure* **24**,  
745 1537–1549 (2016).
- 746 5. V. H. Ryan, et al. Mechanistic View of hnRNPA2 Low-Complexity Domain Structure, Interactions,  
747 and Phase Separation Altered by Mutation and Arginine Methylation. *Mol. Cell* **39**, 465–479  
748 (2018).
- 749 6. S. Elbaum-Garfinkle, et al. The disordered P granule protein LAF-1 drives phase separation into  
750 droplets with tunable viscosity and dynamics. *Proc. Natl. Acad. Sci.* **112**, 7189–7194 (2015).
- 751 7. C. P. Brangwynne, T. J. Mitchison, A. A. Hyman Active liquid-like behavior of nucleoli determines  
752 their size and shape in *Xenopus laevis* oocytes. *Proc. Natl. Acad. Sci.* **108**, 4334–4339 (2011).
- 753 8. B. R. Sabari, et al. Coactivator condensation at super - enhancers links phase separation and  
754 gene control. *Science* **361**, eaar3958 (2018).
- 755 9. A. G. Larson, et al. Liquid droplet formation by HP1 $\alpha$  suggests a role for phase separation in  
756 heterochromatin. *Nature* **547**, 236–240 (2017).
- 757 10. I. A. Sawyer, D. Sturgill, M. Dundr Membraneless nuclear organelles and the search for phases  
758 within phases. *Wiley Interdiscip. Rev. RNA* **10**, 1–20 (2019).
- 759 11. G. Wan, et al. Spatiotemporal regulation of liquid-like condensates in epigenetic inheritance.  
760 *Nature* **557**, 679–683 (2018).
- 761 12. M. R. Marzahn, et al. Higher-order oligomerization promotes localization of SPOP to liquid nuclear  
762 speckles. *EMBO J.* **35**, 1254–1275 (2016).
- 763 13. S. F. Banani, H. O. Lee, A. A. Hyman, M. K. Rosen Biomolecular condensates: Organizers of  
764 cellular biochemistry. *Nat. Rev. Mol. Cell Biol.* **18**, 285–298 (2017).
- 765 14. A. L. Darling, Y. Liu, C. J. Oldfield, V. N. Uversky Intrinsically Disordered Proteome of Human  
766 Membrane-Less Organelles. *Proteomics* **18**, 1700193 (2018).
- 767 15. V. N. Uversky, I. M. Kuznetsova, K. K. Turoverov, B. Zaslavsky Intrinsically disordered proteins as  
768 crucial constituents of cellular aqueous two phase systems and coacervates. *FEBS Lett.* **589**, 15–  
769 22 (2015).
- 770 16. C. P. Brangwynne, P. Tompa, R. V. Pappu Polymer physics of intracellular phase transitions. *Nat.*  
771 *Phys.* **11**, 899–904 (2015).
- 772 17. M. Dzuricky, S. Roberts, A. Chilkoti Convergence of Artificial Protein Polymers and Intrinsically  
773 Disordered Proteins. *Biochemistry* **57**, 2405–2414 (2018).
- 774 18. F. G. Quiroz, A. Chilkoti Sequence heuristics to encode phase behaviour in intrinsically disordered  
775 protein polymers. *Nat. Mater.* **14**, 1164–1171 (2015).
- 776 19. J. R. Simon, N. J. Carroll, M. Rubinstein, A. Chilkoti, G. P. López Programming molecular self-  
777 assembly of intrinsically disordered proteins containing sequences of low complexity. *Nat. Chem.*  
778 **9**, 509–515 (2017).
- 779 20. R. A. Kapelner, A. C. Obermeyer Ionic polypeptide tags for protein phase separation. *Chem. Sci.*  
780 doi:10.1039/C8SC04253E (2019).

- 781 21. B. S. Schuster, et al. Controllable Protein Phase Separation and Modular Recruitment to Form  
782 Responsive, Membraneless Organelles. *Nat. Commun.* **9**, 2985 (2018).
- 783 22. S. Roberts, et al. Injectable tissue integrating networks from recombinant polypeptides with  
784 tunable order. *Nat. Mater.* **17**, 1154–1163 (2018).
- 785 23. J. R. Simon, S. A. Eghtesadi, M. Dzuricky, L. You, A. Chilkoti Engineered Ribonucleoprotein  
786 Granules Inhibit Translation in Protocells. *Mol. Cell* **75**, 1–10 (2019).
- 787 24. H. K. Lau, et al. Microstructured Elastomer-PEG Hydrogels via Kinetic Capture of Aqueous Liquid–  
788 Liquid Phase Separation. *Adv. Sci.* **5**, 1–13 (2018).
- 789 25. A. Hubert, P. Anderson The *C. elegans* sex determination gene *laf-1* encodes a putative DEAD-  
790 box RNA helicase. *Dev. Biol.* **330**, 358–367 (2009).
- 791 26. G. L. Dignon, W. Zheng, Y. C. Kim, R. B. Best, J. Mittal Sequence determinants of protein phase  
792 behavior from a coarse-grained model. *PLoS Comput. Biol.* **14**, e1005941 (2018).
- 793 27. M.-T. Wei, et al. Phase behaviour of disordered proteins underlying low density and high  
794 permeability of liquid organelles. *Nat Chem* **9**, 1118–1125 (2017).
- 795 28. E. W. Martin, T. Mittag Relationship of Sequence and Phase Separation in Protein Low-  
796 Complexity Regions. *Biochemistry* **57**, 2478–2487 (2018).
- 797 29. E. Gomes, J. Shorter The molecular language of membraneless organelles. *J. Biol. Chem.* **294**,  
798 7115–7127 (2018).
- 799 30. J. Wang, et al. A Molecular Grammar Governing the Driving Forces for Phase Separation of Prion-  
800 like RNA Binding Proteins. *Cell* **174**, 688–699 (2018).
- 801 31. A. Kamenska, C. Simpson, N. Standart eIF4E-binding proteins: new factors, new locations, new  
802 roles. *Biochem. Soc. Trans.* **42**, 1238–1245 (2014).
- 803 32. Y. Lin, S. L. Currie, M. K. Rosen Intrinsically disordered sequences enable modulation of protein  
804 phase separation through distributed tyrosine motifs. *J. Biol. Chem.* **292**, 19110–19120 (2017).
- 805 33. S. Rauscher, R. Pomes The liquid structure of elastin. *Elife* **6**, e26526 (2017).
- 806 34. E. P. Bentley, B. B. Frey, A. A. Deniz Physical Chemistry of Cellular Liquid-Phase Separation.  
807 *Chem. - A Eur. J.* **25**, 5600–5610 (2019).
- 808 35. A. C. Murthy, et al. Molecular interactions underlying liquid–liquid phase separation of the FUS  
809 low-complexity domain. *Nat. Struct. Mol. Biol.* **26**, 637–648 (2019).
- 810 36. T. P. Dao, et al. ALS-Linked Mutations Affect UBQLN2 Oligomerization and Phase Separation in a  
811 Position- and Amino Acid-Dependent Manner. *Structure* **27**, 937-951.e5 (2019).
- 812 37. B. Gabryelczyk, et al. Hydrogen bond guidance and aromatic stacking drive liquid-liquid phase  
813 separation of intrinsically disordered histidine-rich peptides. *Nat. Commun.* doi:10.1038/s41467-  
814 019-13469-8.
- 815 38. J.-W. Shih, et al. Critical roles of RNA helicase DDX3 and its interactions with eIF4E/PABP1 in  
816 stress granule assembly and stress response. *Biochem. J.* **441**, 119–29 (2012).
- 817 39. G. L. Dignon, W. Zheng, J. Mittal Simulation methods for liquid-liquid phase separation of  
818 disordered proteins. *Curr. Opin. Chem. Eng.* **23**, 92–98 (2019).
- 819 40. G. L. Dignon, W. Zheng, R. B. Best, Y. C. Kim, J. Mittal Relation between single-molecule  
820 properties and phase behavior of intrinsically disordered proteins. *Proc. Natl. Acad. Sci.* **115**,  
821 9929–9934 (2018).
- 822 41. G. L. Dignon, W. Zheng, Y. Kim, J. Mittal Temperature-Controlled Liquid–Liquid Phase Separation  
823 of Disordered Proteins. *ACS Cent. Sci.* **5**, 821–830 (2019).
- 824 42. J. Couthouis, et al. A yeast functional screen predicts new candidate ALS disease genes. *Proc.*  
825 *Natl. Acad. Sci.* **108**, 20881–20890 (2011).
- 826 43. Z. Sun, et al. Molecular Determinants and Genetic Modifiers of Aggregation and Toxicity for the



- 827 ALS Disease Protein FUS/TLS. *PLoS Biol.* **9**, e1000614 (2011).
- 828 44. Y.-H. Lin, H. S. Chan Phase Separation and Single-Chain Compactness of Charged Disordered  
829 Proteins Are Strongly Correlated. *Biophys. J.* **112**, 2043–2046 (2017).
- 830 45. J. P. Brady, et al. Structural and hydrodynamic properties of an intrinsically disordered region of a  
831 germ-cell specific protein upon phase separation. *Proc. Natl. Acad. Sci.* **114**, E8194–E8203  
832 (2017).
- 833 46. L. Sawle, K. Ghosh A theoretical method to compute sequence dependent configurational  
834 properties in charged polymers and proteins. *J. Chem. Phys.* **143**, 085101 (2015).
- 835 47. T. J. Nott, et al. Phase Transition of a Disordered Nuage Protein Generates Environmentally  
836 Responsive Membraneless Organelles. *Mol. Cell* **57**, 936–947 (2015).
- 837 48. Y. H. Lin, J. P. Brady, J. D. Forman-Kay, H. S. Chan Charge pattern matching as a “fuzzy” mode  
838 of molecular recognition for the functional phase separations of intrinsically disordered proteins.  
839 *New J. Phys.* **19**, 115003 (2017).
- 840 49. A. Lange, et al. Classical nuclear localization signals: definition, function, and interaction with  
841 importin alpha. *J. Biol. Chem.* **282**, 5101–5 (2007).
- 842 50. S. Kosugi, et al. Six classes of nuclear localization signals specific to different binding grooves of  
843 importin alpha. *J. Biol. Chem.* **284**, 478–85 (2009).
- 844 51. S. Qamar, et al. FUS Phase Separation Is Modulated by a Molecular Chaperone and Methylation  
845 of Arginine Cation- $\pi$  Interactions. *Cell* **173**, 720–734 (2018).
- 846 52. Z. Monahan, et al. Phosphorylation of the FUS low-complexity domain disrupts phase separation,  
847 aggregation, and toxicity. *EMBO J.* **36**, 2951–2967 (2017).
- 848 53. J. Song, S. C. Ng, P. Tompa, K. A. W. Lee, H. S. Chan Polycation- $\pi$  Interactions Are a Driving  
849 Force for Molecular Recognition by an Intrinsically Disordered Oncoprotein Family. *PLoS Comput.*  
850 *Biol.* **9** doi:10.1371/journal.pcbi.1003239 (2013).
- 851 54. R. M. Vernon, et al. Pi-Pi contacts are an overlooked protein feature relevant to phase separation.  
852 *Elife* **7**, 1–48 (2018).
- 853 55. C. W. Pak, et al. Sequence Determinants of Intracellular Phase Separation by Complex  
854 Coacervation of a Disordered Protein. *Mol. Cell* **63**, 72–85 (2016).
- 855 56. M. Feric, et al. Coexisting Liquid Phases Underlie Nucleolar Subcompartments. *Cell* **165**, 1686–  
856 1697 (2016).
- 857 57. H. Zhang, et al. RNA Controls PolyQ Protein Phase Transitions. *Mol. Cell* **60**, 220–230 (2015).
- 858 58. N. O. Taylor, M. T. Wei, H. A. Stone, C. P. Brangwynne Quantifying Dynamics in Phase-  
859 Separated Condensates Using Fluorescence Recovery after Photobleaching. *Biophys. J.* **117**,  
860 1285–1300 (2019).
- 861 59. A. Bah, et al. Folding of an intrinsically disordered protein by phosphorylation as a regulatory  
862 switch. *Nature* **519**, 106–109 (2015).
- 863 60. J. J. McCarty, K. T. Delaney, S. P. O. Danielsen, G. H. Fredrickson, J.-E. Shea Complete Phase  
864 Diagram for Liquid-liquid Phase Separation of Intrinsically Disordered Proteins. *J. Phys. Chem.*  
865 *Lett.* **10**, 1644–1652 (2019).
- 866 61. S. Qamar, et al. FUS Phase Separation Is Modulated by a Molecular Chaperone and Methylation  
867 of Arginine Cation- $\pi$  Interactions. *Cell*, 720–734 (2018).
- 868 62. R. D. Gietz, A. Sugino New yeast-Escherichia coli shuttle vectors constructed with in vitro  
869 mutagenized yeast genes lacking six-base pair restriction sites. *Gene* **74**, 527–534 (1988).
- 870 63. F. W. Studier Stable Expression Clones and Auto-Induction for Protein Production in E. coli.  
871 *Methods in Molecular Biology (Clifton, N.J.)*, pp 17–32. (2014).
- 872 64. T. Zhang, et al. An improved method for whole protein extraction from yeast *Saccharomyces*  
873 *cerevisiae*. *Yeast* **28**, 795–798 (2011).

- 874 65. E. Bi, J. R. Pringle *ZDS1 and ZDS2, Genes Whose Products May Regulate Cdc42p in*  
875 *Saccharomyces cerevisiae* Available at: <http://mcb.asm.org/> [Accessed July 24, 2019] (1996).
- 876 66. J. A. Anderson, C. D. Lorenz, A. Travesset General purpose molecular dynamics simulations fully  
877 implemented on graphics processing units. *J. Comput. Phys.* **227**, 5342–5359 (2008).
- 878 67. R. B. Best, W. Zheng, J. Mittal Balanced protein-water interactions improve properties of  
879 disordered proteins and non-specific protein association. *J. Chem. Theory Comput.* **10**, 5113–  
880 5124 (2014).
- 881 68. J. L. Abascal, C. Vega A general purpose model for the condensed phases of water: TIP4P/2005.  
882 *J. Chem. Phys.* **123**, 234505 (2005).
- 883 69. Y. Luo, B. Roux Simulation of osmotic pressure in concentrated aqueous salt solutions. *J. Phys.*  
884 *Chem. Lett.* **1**, 183–189 (2010).
- 885 70. Y. Sugita, Y. Okamoto Replica exchange molecular dynamics method for protein folding. *Chem.*  
886 *Phys. Lett.* **314**, 141–151 (1999).
- 887 71. A. Barducci, G. Bussi, M. Parrinello Well-tempered metadynamics: A smoothly converging and  
888 tunable free-energy method. *Phys. Rev. Lett.* **100**, 1–4 (2008).
- 889 72. M. Bonomi, M. Parrinello Enhanced sampling in the well-tempered ensemble. *Phys. Rev. Lett.*  
890 **104**, 1–4 (2010).
- 891 73. B. Hess, C. Kutzner, D. Van Der Spoel, E. Lindahl GROMACS 4: Algorithms for highly efficient,  
892 load-balanced, and scalable molecular simulation. *J. Chem. Theory Comput.* **4**, 435–447 (2008).
- 893 74. G. A. Tribello, M. Bonomi, D. Branduardi, C. Camilloni, G. Bussi PLUMED 2: New feathers for an  
894 old bird. *Comput. Phys. Commun.* **185**, 604–613 (2014).
- 895 75. P. Tiwary, M. Parrinello A time-independent free energy estimator for metadynamics. *J. Phys.*  
896 *Chem. B* **119**, 736–742 (2015).
- 897 76. G. L. Dignon, W. Zheng, Y. C. Kim, J. Mittal Temperature-Controlled Liquid-Liquid Phase  
898 Separation of Disordered Proteins. *ACS Cent. Sci.* **5**, 821–830 (2019).
- 899

## 900 1. Supporting Text

### 901 1.1 Sequences used in in vitro work (including His tag and XhoI restriction site).

902  
903 LAF-1 RGG WT [Highlighted residues: 21-30 (red); 82-91 (blue); 101-110 (green)]:  
904 MESNQSNNGG SGNAALNRGG **RYVPPHLRGG** DGGAAAAASA GGDDRRGGAG GGGYRRGGGN SGGGGGGGYD  
905 RGYNDNRDDR DNRGGSGGYG RDRNYEDRGY NGGGGGGGR GYNNNRGGGG GGYNRQDRGD GGSSNFSRGG  
906 YNNRDEGSDN RGSGRSYNN RRDNGGDGLE HHHHHH

#### 907 LAF-1 RGG Δ21-30:

908  
909 MESNQSNNGG SGNAALNRGG DGGAAAAASA GGDDRRGGAG GGGYRRGGGN SGGGGGGGYD RGYNDNRDDR  
910 DNRGGSGGYG RDRNYEDRGY NGGGGGGGR GYNNNRGGGG GGYNRQDRGD GGSSNFSRGG YNNRDEGSDN  
911 RGSGRSYNN RRDNGGDGLE HHHHHH

#### 912 LAF-1 RGG Δ82-91:

913  
914 MESNQSNNGG SGNAALNRGG RYVPPHLRGG DGGAAAAASA GGDDRRGGAG GGGYRRGGGN SGGGGGGGYD  
915 RGYNDNRDDR DDRNYEDRGY NGGGGGGGR GYNNNRGGGG GGYNRQDRGD GGSSNFSRGG  
916 YNNRDEGSDN RGSGRSYNN RRDNGGDGLE HHHHHH

#### 917 LAF-1 RGG Δ101-110:

918  
919 MESNQSNNGG SGNAALNRGG RYVPPHLRGG DGGAAAAASA GGDDRRGGAG GGGYRRGGGN SGGGGGGGYD  
920 RGYNDNRDDR DNRGGSGGYG RDRNYEDRGY GYNNNRGGGG GGYNRQDRGD GGSSNFSRGG YNNRDEGSDN  
921 RGSGRSYNN RRDNGGDGLE HHHHHH

#### 922 LAF-1 RGG<sub>shuf</sub>:

923  
924 MNNSGDNDRG SGNYGLRNSF GDDGYGDNGN DEGNSGYRNR GLGGDRADEY GNSGGNGDNE AAPNASDRDD  
925 AHYYDSDDYD DGGGGRGSGG AGGGGARGPG SNRAGRYGGG GRRGRGRNG YNGNRSQRRR GGGRGRGNRG  
926 YRVGNNGQS GGRNSRGGG GNGGANYGLE HHHHHH

#### 927 LAF-1 RGG<sub>shuf-pres</sub>:

928  
929 MGGYGYGSSG DGGGDDYDGA **RYVPPHLR**GY GDGAGDDGGD NNDDSDDADR DYNGGLSGBA GNSGGDGEN  
930 GGDGNGRNNA RSGNNRGGNG NYRYFGANYG AGEGRGRNGQ GGEESGNNRG GGGRYGRRR QGSRGGRGSG  
931 GNYGGNSNRS GRAGGRDNNA RNRRRNGSLE HHHHHH

#### 932 LAF-1 RGG R to K:

933  
934 MESNQSNNGG SGNAALNKGG KYVPPHLKGG DGGAAAAASA GGDDKKGGAG GGGYKKGGGN SGGGGGGGYD  
935 KGYNDNKDDK DNKGGSGGYG KDKNYEDKGY NGGGGGGKNK GYNNNKGGGG GGYNKQDKGD GGSSNFSKGG  
936 YNNKDEGSDN KSGKSYNN RRDNGGDGLE HHHHHH

#### 937 LAF-1 RGG Y to F:

938  
939 MESNQSNNGG SGNAALNRGG RFVPPHLRGG DGGAAAAASA GGDDRRGGAG GGGFRRGGGN SGGGGGGGFD  
940 RGFNDNRDDR DNRGGSGGFG RDRNWEDRGF NGGGGGGGR GFNNNRGGGG GGFNRQDRGD GGSSNFSRGG  
941 FNNRDEGSDN RGSGRSFNND RRDNGGDGLE HHHHHH

### 942 1.2 LAF-1 homologs used in sequence alignment (accession numbers)

#### 943 LAF-1, *C. elegans* (NP\_001254859.1):

944  
945  
946 MESNQSNNGG SGNAALNRGG RYVPPHLRGG DGGAAAAASA GGDDRRGGAG GGGYRRGGGN SGGGGGGGYD  
947 RGYNDNRDDR DNRGGSGGYG RDRNYEDRGY NGGGGGGGR GYNNNRGGGG GGYNRQDRGD GGSSNFSRGG  
948 YNNRDEGSDN RGSGRSYNN RRDNGGDGQN TRWNNLDAPP SRGTSKWENR GARDERIEQE LFSGQLSGIN  
949 FDKYEEIPVE ATGDDVPQPI SLFSDLSLHE WIEENIKTAG YDRPTPVQKY SIPALQGGRD LMSCAQTGSG  
950 KTA AFLVPLV NAILQDGPDA VHRSVTSSGG RKKQYPSALV LSPTRELSLQ IFNESRKFAY RTPITSALLY  
951 GGRENYKQDI HKLRLGCHIL IATPGRLIDV MDQGLIGMEG CRYLVLEAD RMLDMGFEPQ IRQIVECNRM  
952 PSKEERITAM FSATFPKEIQ LLAQDFLKEN YVFLAVGRVG STSENIMQKI VWVEEDEKRS YLMDLLDATG  
953 DSSLTLVFVE TKRGASDLAY YLNRQNYEVV TIHGDLKQFE REKHLDFLRT GTAPILVATA VAARGLDIPN



955 VKHVINYDLP SDVDEYVHRI GRTGRVGNVG LATSFFNDKN RNIARELMDL IVEANQELPD WLEGMSGDMR  
956 SGGGYRGRGG RGNGQRFQGR DHRYQGGSGN GGGGNGGGGG FGGGGQSSGG GGGFQSSGGG GRQQQQQQRA  
957 QPQQDWWWS  
958  
959 **DDX3X, *H. sapiens* (NP\_001180345.1):**  
960 MSHVAVENAL GLDQQFAGLD LNSSDNQSSG STASKGRYIP PHLRNREATK GFYDKDSSGW SSSKDKDAYS  
961 SFGSRSDSRG KSSFFSDRGS GSRGRFDDR RSDYDGIISR GDRSGFGKFE RGGNSRWCDK SDEDDWSKPL  
962 PPSEERLEQEL FSGGNTGINF EKYDDIPVEA TGNNCPPIE SFSDVEMGEI IMGNIELTRY TRPTPVQKHA  
963 IPIIIEKRDL MACAQTGSGK TAAFLLPILS QIYSDGPGEA LRAMKENGRI GRRKQYPIISL VLAPTRELAV  
964 QIYEEARKFS YRSRVRPCVV YGGADIGQQI RDLERGCHELL VATPGRLVDM MERGKIGLDF CKYLVLEAD  
965 RMLDMGFEPQ IRRIVEQDTM PPKGVRHTMM FSATFPKEIQ MLARDFLDEY IFLAVGRVGS TSENITQKVV  
966 WVEESDKRSF LLDLLNATGK DSLTLVVFVET KKGADSLDF LYHEGYACTS IHGDRSQDRR EEALHQFRSG  
967 KSPILVATAV AARGLDISNV KHVINFDLPS DIEEYVHRIG RTGRVGNLGL ATSFNERNI NITKDLLDLL  
968 VEAKQEVPSW LENMAYEHY KSSSRGRSKS RFSGGFGARD YRQSSGASS SFSSSRASS RSGGGGHGSS  
969 RGFGGGGYGG FYNSDGYGGN YNSQGVDDWWG N  
970  
971 **DEAD box helicase 3b isoform 5X, *D. rerio* (XP\_005168849.1)**  
972 MSHVAVENVH GLDQQLAALD LSSADVQGVV GRRYIIPHLR NKEAAKNDAV GGWDNGRSNG FVNGYHDGRD  
973 NRMNGGSSFA GRGPIRSDRG GRGGFRGKST ASYNPIQPMQ SAGFGYDNKE AGGWNVPKDN AYNSFGGRSD  
974 RGKSSFFNDR GSSSRGRYER GFGGGGNSR WVEECRDEDW SKPLPPNERL EHELFSGSNT GINFEKYDDI  
975 PVEATGHNGP QPIDRFHDL MGEIIMGNI LSRVTRPTPV QKHAIPIIKS KRDLMACAQT GSGKTA AFLL  
976 PVLSQIYTDG PGEALQAANK SAQENKYGK RKQYPIISLV APTRELALQI YDEARKFSYR SHVRPCVVYV  
977 GADIGQQIRD LERGCHLLVA TPGRLVDMME RGKIGLDYCN YLVLEADRM LDMGFEPQIR RIVEQDTMPP  
978 KGLRQTMMSF ATFPKEIQIL ARDFLEDYIF LAVGRVGSTS ENITQKVWVW EENDKRSFLL DLLNATGKDS  
979 LTLVVFVETKK GADALEDFLY REGYACTSIH GDRSQDRREE ALHQFRSGRC PILVATAVAA RGLDISNVKH  
980 VINFDLPSDI EEYVHRIGRT GRVGNLGLAT SFFNDKNGNI TKDLLDILVE AKQEVPSWLE SLAYEHQHS  
981 SSRGRSKRFS GFGGARDYRQ NSSSGGGGFG GRGGRSTGGH GGNRGGGGGG FGNFYSSDGY GGNYSQVDWWG  
982 N  
983  
984 **DEAD-box helicase 3 X-linked L homeolog, *X. laevis* (NP\_001080283.1)**  
985 MSHVAVENVL NLDQQFAGLD LNSADAESGV AGTKGRYIPP HLRNKEASRN DSNWDSGRGG NGYINGMQDD  
986 RDGRMNGYDR GGYGSRGTGR SDRGFYDREN SGWNSGRDKD AYSSFGSRGE RGKGSFLFNDK GSGSRRPDES  
987 RPDGFDGVDN RGNNSSFRGF DRGNSRWSDE RNDEDDWSKP LAPNDRVEQE LFSGSNTGIN FEKYDDIPVD  
988 ATGSNCPPIH ECFQDQDVMGE IIMGNIQLTR YTRPTPVQKH AIPPIIGKRD LMACAQTGSG KTA AFLLPIL  
989 SQIYADGPGD AMKHLKDNDR YGRRKQFPLS LVLAPTRELA VQIYEEARKF AYRSRVRPCV VYGGADIGQQ  
990 IRDLERGCHE LVATPGRLVD MMEGKIGLD FCKYLVLEA DRMLDMGFEP QIRRIVEQDT MPPKGVRQTM  
991 MFSATFPKEI QILARDFLDE YIFLAVGRVG STSENITQKV VWVEEMDKRS FLLDLLNATG KDSLTLVFVE  
992 TKKGADALED FLYHEGYACT SIHGDRSQDR REEALHQFRS GKCPILVATA VAARGLDISN VKHVINFDLP  
993 SDIEEYVHRI GRTGRVGNLG LATSFFNEKN INITKDLLDL LVEAKQEVPS WLENMAYEQH HKSSSRGRSK  
994 SRFSGGFGAK DYRQSSSAGS SFGSSRGGRS SGHGGSRAFG GYGGFYNSD GYGGNYGGSS QVDWWGN  
995  
996 **Belle isoform B, *D. melanogaster* (NP\_001262379.1)**  
997 MSNAINQNGT GLEQQVAGLD LGGGSADYSG PITSKTSTNS VTGGVYVPPH LRGGGGNNA ADAESQGGQ  
998 GQGQGFDSRS GNPRQETRD QQRSGGGGEY RGGGGGGRG FNRQSGDYGY GSGGGGRRGG GGRFEDNYNG  
999 GEFDSRRGGD WNRSGGGGGG GRGFGRGPSY RGGGGGSGSN LNEQTAEDGQ AQQQQQPRND RWQEPERPA  
1000 FDGSEGGQSA GGNRSYNNRG ERGGGGYNSR WKEGGGSNVD YTKLGARDER LEVELFGVGN TGINFDKYED  
1001 IPVEATGQNV PPNITSFDDV QLTEIIRNV ALARYDKPTP VQKHAIPIII NGRDLMACAQ TSGKTA AFL  
1002 VPILNQMYEL GHVPPPQSTR QYSRRKQYPL GLVLAPTREL ATQIFEEAKK FAYRSRMRPA VLYGGNNTSE  
1003 QMRELDRGCH LIVATPGRLE DMITRGKVL ENIRPLVLE ADRMLDMGFE PQIRRIVEQL NMPPTGQRQT  
1004 LMFSAFPKQ IQELASDFLS NYIFLAVGRV GSTSENITQT ILWVYEPDKR SYLLDLLSSI RDGPEYTKDS  
1005 LTLIFVETKK GADSLEEFY QCNHPVTSIH GDRTQKERE ALRCFRSGDC PILVATAVAA RGLDIPVKH  
1006 VINFDLPSDV EEYVHRIGRT GRMGNLGVAT SFFNEKNRNI CSDLLELLIE TKQEIPSFME DMSSDRGHGG  
1007 AKRAGRGGGG RYGGGFGSRD YRQSSGGGGG GRSGPPPSG GSGSGGGGG YRSNGNSYK FGGNSGGGGY  
1008 YGGGAGGGSY GGSYGGGSAS HSSNAPDWWA Q  
1009  
1010 **DDX3X-like RNA helicase, *E. pallida* (XP\_020899200.1)**  
1011 MSHVAPGNQQ SLDQRFAGLD LNSGVGNPD AGHNQRQRY VPPHLRRNPQ ELFHNDPRNP VNFPSGGAPQ

1012 QFQGGGRDGA FRGMNYGGKY NNFGGGGYGG GGGGGYGGRG GYGGAGYRRG GGGGNWREERG GNNYWGNNNSG  
 1013 YDDRDSYAKT ARPEDWSKLL PKNDRIEREL FGGHNTGINF EKYDDIPVEA TGQDCPQIE SFTDVDLGEI  
 1014 LTHNIQLANY SKPTPVQKYA IPIVKHKRDL MACAQTGSGK TAAFLIPILS RIYQEGPPPA PDAKHTSRRR  
 1015 QYPVCLVLAP TRELAVQIFD EARKFAYCSL VRPCVVYGGG DIGSQLRELD RGCHLLVATP GRLVDMMDRG  
 1016 RIGLDVIKFL VLDEADRMLD MGFEPQIRRI VDQDTMPKAG DRQTLMFSAF FPKEIQILAR DFLDNYIFLA  
 1017 VGRVGSTSEN ITQKIVWVDE YDKRSFLLDL LNASGPDALT LVFVETKKGGA DSLELFLYKD GYQCTSIHGD  
 1018 RSQSEREAL RSFRSGKTPI LVATAVAARG LDINNVRHVI NFDLPSDIEE YVHRIGRTGR VGHTGLATSF  
 1019 FNEKNKNVAK DLLSLVTETG QEVPSWLESI AYESNQNKR GPRRYGGFGG SRDYRQQRGN SAQMNQMHGY  
 1020 GYGGGGGGGY MHYGGYSGGG GGGGSGGRYH GGGGGGGGGD WNN

1021  
 1022 **Hypothetical protein, *M. brevicolis* (XP\_001747837.1)**

1023 MSNGANPNNGS DLSQHMDLDT LTKTKPSGGS RYVPPHLRNR QPSGPAPPSG GRTAAPPVSA PPPSSNNGGR  
 1024 DFGSSRPPRG SRDGSRDGSG SRPPRDGGRG GSWDVQPRFQ QEDWTRPLKR NERMEEELFG SNHRTGGINF  
 1025 EKYDDIPVEA SGNNVPAHIS EFATAGLCEL MTGNLELARY TVPTPVQKYS IPIVQAKRDL MACAQTGSGK  
 1026 TAAFLVPILN RVYETGPVPP PPNARRSQF PVALILAPTR ELAIQIYGEA QKFSYRSRVR ICCVYGGASP  
 1027 RDQIQDLRRG CQLLVATPGR LVDFMERGVI GLDSIRFLVL DEADRMLDMG FEPQIRRIVE EDNMPQVGIR  
 1028 QTLMFSAFP KDIQMLAQDF LDDYVHLSVG RVGSTSENIQ QIVHWIDEAD KRPSLLDLIS AASSEDLFLI  
 1029 FVETKKAADA LEYYLTMQGR PATSIHGDRY QYEREEALAD FRAGRPIPV ATAVAARGLD IPNVKRVINP  
 1030 DLPSDIDEYV HRIGRTGRAG HKGTAVSFFN DKNRNVARDL LN

1031  
 1032 **Dbp1p, *S. cerevisiae* (AJW08300.1)**

1033 MADLPQKVSQ LSINNKENG DGGKSSYVPP HLRSRGKPSF ERSTPKQEDK VTGGDFFRRA GRQTGNNGGF  
 1034 FGFSKERNNG TSANYNRGGS SNYKSSGNRW VNGKHIPGPK NAKLEAELFG VHDDPDYHSS GIKFDNYDDI  
 1035 PVDASGKQV EPILDFSSPP LDELLMENIK LASFTKPTPV QKYSIPIVTK GRDLMACAQT GSGKTGGFLF  
 1036 PLFTELFRRG PSPVPEKAQS FYSRKGYPSA LVLAPTRELA TQIFEEARKF TYRSWVRPCV VYGGAPIGNQ  
 1037 MREVDRCGLD LVATPGRLND LLERGVSLA NIKYLVLEA DRMLDMGFEP QIRHIVEECD MPSVENRQTL  
 1038 MFSATFPVDI QHLARDFLDN YIFLSVGRVG STSENITQRI LYVDDMDKKS ALLDLSAEH KGLTLIFVET  
 1039 KRMADQLTDF LIMQNFKATA IHGDRYQAE ERALSFAKAN VADILVATAV AARGLDIPNV THVINYLPS  
 1040 DIDDYVHRIG RTGRAGNTGV ATSFNSNNQ NIVKGLMEIL NEANQEVPTF LSDLSRQNSR GGRTRGGGGF  
 1041 FNSRNNRSR YRKHGSGSGF GSTRPRNTGT SNWGSIGGGF RNDNEKNGYG SSNASWW

1042  
 1043 **Sum3, *S. pombe* (NP\_588033.1)**

1044 MSDNVQQQVD SVGSVTEKLQ KTNISRPRKY IPPFARDKPS AGAAPAVGDD ESVSSRGSSR SQTPEFSSN  
 1045 YGGRREYNRG GHYGGGEGRQ NNYRGGREGG YSNGGGYRNN RGFGQWRDQ HVIGARNTLL ERQLFGAVAD  
 1046 GTKVSTGINF EKYDDIPVEV SGGDIEPVNE FTSPPLNSHL LQNIKLSGYT QPTPVQKNSI PIVTSGRDLN  
 1047 ACAQTGSGKT AGFLFPILSL AFDKGPAAVP VDQDAGMGYR PRKAYPTTLI LAPTRQLVCQ IHEESRKFY  
 1048 RSWVRPCAVY GGADIRAQIR QIDQGC DLLS ATPGRLVDLI DRGRISLANI KFLVLDEADR MLDMGFEPQI  
 1049 RHIVEGADMT SVEERQTLMF SATFPRDIQL LARDFLKYD FLSVGRVGST SENITQKVVH VEDSEKRSYL  
 1050 LDILHTLPPE GLTLIFVETK RMADTLTDYL LNSNFPATSI HGDRTQRE RE RALELFRSGR TSIMVATAVA  
 1051 SRGLDIPNVT HVINYDLPTD IDDYVHRIGR TGRAGNTGQA VAFFNRNNKG IAKELIELLQ EANQECPSFL  
 1052 IAMARESSFG GNGRGGYSG RGGRGGNAYG ARDFRRPTNS SSGYSSGPSY SGYGGFESRT PHHGNTYNSG  
 1053 SAQSWW

1054

1055 **1.3 Homolog sequence alignment**

1056  
 1057 NP\_001254859.1 -----MESN--QS-----NNGGSGNAALNRGGRYVPPHLRGGDGGAAA 36  
 1058 NP\_001262379.1 MSNAINQNGTGLEQQVAGLDLNGGSADYSGPI TSKTSTNSVTGGVYVPPHLRGGGNNNA 60  
 1059 XP\_001747837.1 MSNGANPNNGS DLSQHMDLDTLTKTKP-----SGGSRVYVPPHLRNRQPSGPA 46  
 1060 XP\_020899200.1 MSHVAPGNQQSLDQRFAGLDLNSGVGNP-----DAGHNQRQRYVPPHLRNPQELFH 54  
 1061 XP\_005168849.1 MSHVAVENVHGLDQQLAALDLSSADV--Q-----G----VTGRRYI PPHLRNKEAANK- 47  
 1062 NP\_001180345.1 MSHVAVENALGLDQQFAGLDLNSSDN--Q-----SGGSTASKGRYI PPHLRNREA---- 48  
 1063 NP\_001080283.1 MSHVAVENVNLNDQQFAGLDLNSADA--E-----SG-VAGTKGRYI PPHLRNKEASRN- 50  
 1064 AJW08300.1 MAD-----LPQKVSNLS-I-----N-NKENGDDGGKSSYVPPHLRSRGKPSFE 41  
 1065 NP\_588033.1 MSDN-----VQQQVDSVGSV-----TEKLQKTNISRPRKYI PPFARDKPSAGAA 44  
 1066 : \* : \* \* \* \*  
 1067  
 1068 NP\_001254859.1 AASAGDDRRGGAGGGGYRRG-----GGNS----- 61  
 1069 NP\_001262379.1 ADAESQGGQ--GQGQGFDSRSGNPRQETRD PQSRGGGGGEYRRGGGGGGRGNRQSGDY 118

|      |                |                                                               |     |
|------|----------------|---------------------------------------------------------------|-----|
| 1070 | XP_001747837.1 | ----PPS---GGRTAAPPVS-----A                                    | 60  |
| 1071 | XP_020899200.1 | NDPRNPVNFPSGGAPQFQGG-----GRDGAFRGMNYGG-----                   | 88  |
| 1072 | XP_005168849.1 | ---DAPGGWDNGR-SNGFVNG-----YHDGRDNRMMNGSSS---AGRG              | 83  |
| 1073 | NP_001180345.1 | -----                                                         | 48  |
| 1074 | NP_001080283.1 | ---DS--NWDSSGRGGNGYING-----MQDDRDGRMNGYDR-----                | 80  |
| 1075 | AJW08300.1     | RSTPKQED-----KV-----                                          | 51  |
| 1076 | NP_588033.1    | PAVGDDSVSSR-----GSSRSQ-----                                   | 62  |
| 1077 |                |                                                               |     |
| 1078 | NP_001254859.1 | ---GGGGGG---YDRGYNDNRDD-----RDNRGGSGGYGRDRNY                  | 95  |
| 1079 | NP_001262379.1 | GYSGGGGRRGGGRFEDNY-----NGGEFDSRRGGDWRNSGGGGGGGRGFRGSPSY       | 170 |
| 1080 | XP_001747837.1 | PPSSSNGG-----GRDFGSSRFP                                       | 78  |
| 1081 | XP_020899200.1 | -----KYNFNGGGGGY                                              | 99  |
| 1082 | XP_005168849.1 | PIRSDRGGRRGGRFKSTASYNPIQPMQSAGFGYDNKEAGGWNVPKD--NAYNSFGGRSD-  | 140 |
| 1083 | NP_001180345.1 | -----TKGFYDKDSSGWSSSKDK-DAYSFGSRSDS                           | 78  |
| 1084 | NP_001080283.1 | -----G---GYGSRG-----TGRSDRGFYDRENSGWNSGRDK-DAYSFGSRGE-        | 120 |
| 1085 | AJW08300.1     | -----TGGDF-----FR-RAGRQTG                                     | 65  |
| 1086 | NP_588033.1    | -----TPSEF-----SSNYGGRREY                                     | 77  |
| 1087 |                |                                                               |     |
| 1088 |                |                                                               |     |
| 1089 | NP_001254859.1 | EDRGYNGGGGGGNGRYNNRRGGGGG-----YNRQDRGDGSSNFSRGGYNNRDEGSDN     | 150 |
| 1090 | NP_001262379.1 | -----RGGG---GGSGNLSNEQTAEDGQAQQQQQPRNDRWQEPERPAFGDGEQG-QS     | 219 |
| 1091 | XP_001747837.1 | -----RGSR-----D-----G-----                                    | 84  |
| 1092 | XP_020899200.1 | -----GGG---GGY---G-----RGGYGGG---                             | 116 |
| 1093 | XP_005168849.1 | -----RGKS-----SFFN---DRGSS-----SRGRYER-----                   | 160 |
| 1094 | NP_001180345.1 | -----RGKS-----SFFS---DRGSG-----SRGRFDDRGRSDYDGIG-----         | 108 |
| 1095 | NP_001080283.1 | -----RGKG-----SLFN---DKGSG-----SRRP-DESRPDGFDGVG-----         | 149 |
| 1096 | AJW08300.1     | NNGGFF-----GFSKERNG-----GT-----                               | 81  |
| 1097 | NP_588033.1    | NRGGHYGGG-----EGRQNNYRG-----GR-----                           | 97  |
| 1098 |                |                                                               |     |
| 1099 |                |                                                               |     |
| 1100 | NP_001254859.1 | RGSGRSYNNDRRDNGGDQNTWRNNLDA-----PPSRGTSKWENRGARDERIEQELFS     | 203 |
| 1101 | NP_001262379.1 | AGGNRSYNN-RGERGGGGYNSRWKE-----GGGSNVDYTKLGARDERLEVELFG        | 267 |
| 1102 | XP_001747837.1 | ---SRDMGG-SRPRDGGRRGGSWDV-----QPRFQQEDWTRPLKRNEMEEEELFG       | 130 |
| 1103 | XP_020899200.1 | ---YRRGGG-GGNWRERGGNNYWGNSGYDDRDSYAKTARPEWWSKLLPKNDRIERELFG   | 172 |
| 1104 | XP_005168849.1 | -----GGFGGGNSRWV-----EEC-RDEDWSKPLPNERLEHELFS                 | 196 |
| 1105 | NP_001180345.1 | ---SRGDRS-GFGKFERGGNSRWC-----DKSDEDDWSKPLPPSERLEQELFS         | 152 |
| 1106 | NP_001080283.1 | ---NRGNNS-SFGRFDRGN-SRWS-----DERNDEDWSKPLAPNDRVEQELFS         | 193 |
| 1107 | AJW08300.1     | ---SANYNR-GGSNNYKSSGNRWVN-----GKHIPGPKNAKLEAELFG              | 120 |
| 1108 | NP_588033.1    | ---EGGYSN-GGGRNRRGFGQWRD-----GQHVIGARNTLLERQLFG               | 136 |
| 1109 |                | * . : * : ** .                                                |     |
| 1110 |                |                                                               |     |
| 1111 | NP_001254859.1 | GQ-----LSGINFDKYEEIPVEATGDDVPPQISLFSDLSLHEWIEENIKTAGYDRPTPV   | 257 |
| 1112 | NP_001262379.1 | VG-----NTGINFDKYEDIIPVEATGQNVPPNITSFDDVQLTEIIRNNVALARYDKPTPV  | 321 |
| 1113 | XP_001747837.1 | SNH---RTGGINFKEYDDIPVEASGNVPAHISEFATAGLCELMGTGNLELARYTVPTPV   | 186 |
| 1114 | XP_020899200.1 | GH-----NTGINFEKYDDIPVEATGQDCPQNIESTFDVLDLGEILTHNIQLANYSKPTPV  | 226 |
| 1115 | XP_005168849.1 | GS-----NTGINFEKYDDIPVEATGHNQPPIDRFHDLMEGEIIMGNIINLSRYTRPTPV   | 250 |
| 1116 | NP_001180345.1 | GG-----NTGINFEKYDDIPVEATGNCPHIESFSDVEMGEIIMGNIQLTRYTRPTPV     | 206 |
| 1117 | NP_001080283.1 | GS-----NTGINFEKYDDIPVDATGNSCPHIECFQDVMGEIIMGNIQLTRYTRPTPV     | 247 |
| 1118 | AJW08300.1     | VHDDPDYHSSGKIFDNYDDIPVDASGKDVPEPILDFSSPPLDELLMENIKLASFTKPTPV  | 180 |
| 1119 | NP_588033.1    | AVADGTVKSTGINFEKYDDIPVEVSGGDI-EPVNEFTSPPLNSHLLQNIKLSGYTQPTPV  | 195 |
| 1120 |                | **:*:*:*:*:*:*:* : * : . : * : : : ****                       |     |
| 1121 |                |                                                               |     |
| 1122 | NP_001254859.1 | QKYSIPALQGGRLMCAQTGSGKTAFLVPLVNAILOQDGPDAVHRSVT-----SSGGR     | 311 |
| 1123 | NP_001262379.1 | QKHAIPIIINGRDLMACAQTGSGKTAFLVPIILNQMYELGHVPPPQST-----RQYSR    | 374 |
| 1124 | XP_001747837.1 | QKYSIPIVQAKRDLMACAQTGSGKTAFLVPIILNRVYETGPVPPPPNA-----RR       | 236 |
| 1125 | XP_020899200.1 | QKYAIPIVKHKRDLMACAQTGSGKTAFLVPIILSRIYQEGPPAPDA-----KHTSR      | 278 |
| 1126 | XP_005168849.1 | QKHAIPIIKSKRDLMACAQTGSGKTAFLVPLVLSQIYTDGPGALQAAKNSAQENGKYGR   | 310 |
| 1127 | NP_001180345.1 | QKHAIPIIIEKRDLMACAQTGSGKTAFLVPLVLSQIYSDGPGALRAM----KENGRYGR   | 262 |
| 1128 | NP_001080283.1 | QKHAIPIIIGKRDLMACAQTGSGKTAFLVPLVLSQIYADGPGDAMKHL----KDNRYGR   | 303 |
| 1129 | AJW08300.1     | QKYSIPIVTKGRDLMACAQTGSGKTAGFLVPLVPLFTELFRSGPSVPEKA-----QSFS   | 233 |
| 1130 | NP_588033.1    | QKNSIPIVTSGRDLMACAQTGSGKTAGFLVPLVPLVPLVPLVPLVPLVPLVPLVPLVPLV  | 251 |
| 1131 |                | ** : ** : ****:*****.***:.. *                                 |     |
| 1132 |                |                                                               |     |
| 1133 | NP_001254859.1 | KKQYPSALVLSPTRELSLQIFNESRKFAYRTPITSALLYGGRENYKDQIHKLRGCHILI   | 371 |
| 1134 | NP_001262379.1 | RKQYPLGLVLAPTRELATQIFEEAKKFAYRSRMRPAVLYGGNN-TSEQMRDLRGCHLIV   | 433 |
| 1135 | XP_001747837.1 | SQQFVALIILAPTRELAIQIYGEAQKFSYRSRVRICCVYGGAS-PRDQIQDLRRGCQLLV  | 295 |
| 1136 | XP_020899200.1 | RRQYFVCLVLAPTRELAVQIFDEARKFAYCSLVRPCVVYGGAD-IGSQLRELDRGCHLLV  | 337 |
| 1137 | XP_005168849.1 | RKQYPIISLVLAPTRELALQIYDEARKFYSRSHVRPCVVYGGAD-IGQQIRDLEGRCHLLV | 369 |
| 1138 | NP_001180345.1 | RKQYPIISLVLAPTRELAVQIYEEARKFYSRSHVRPCVVYGGAD-IGQQIRDLEGRCHLLV | 321 |
| 1139 | NP_001080283.1 | RKQYPLSLVLAPTRELAVQIYEEARKFAYRSRVRPCVVYGGAD-IGQQIRDLEGRCHLLV  | 362 |

|      |                |                                                                               |     |
|------|----------------|-------------------------------------------------------------------------------|-----|
| 1140 | AJW08300.1     | RKGYPALVLPATRELATQIFEEARKFTYRSWVRPCVYGGAP-IGNQMREVDRCDDL                      | 292 |
| 1141 | NP_588033.1    | RKAYPTTLILAPRELVCQIHESRKFYRSWVRPCAVYGGAD-IRAQIRQIDQGCDDL                      | 310 |
| 1142 |                | : * * : * : * * * * * * * * : * : * * * : : . : * * * * * * : * : * : * * : * |     |
| 1143 |                |                                                                               |     |
| 1144 | NP_001254859.1 | ATPGRLLIDVMDQGLIGMEGRYLVLDDEADRMLDMGFEPQIRQIVECNRMPSKEERITAMF                 | 431 |
| 1145 | NP_001262379.1 | ATPGRLEDIMTRGKVLENIRFLVLDEADRMLDMGFEPQIRRIIVEQLNMPPTGQRQTLMF                  | 493 |
| 1146 | XP_001747837.1 | ATPGRLVDFMERGVIGLDSIRFLVLDEADRMLDMGFEPQIRRIIVEEDNMPQVGIRQTLMF                 | 355 |
| 1147 | XP_020899200.1 | ATPGRLVDMMDRGRIGLDVIKFLVLDEADRMLDMGFEPQIRRIIVDQDTPKAGDRQTLMF                  | 397 |
| 1148 | XP_005168849.1 | ATPGRLVDMMERGKIGLDYCNLYLVLDDEADRMLDMGFEPQIRRIIVEQDTPPKGLRQTMMF                | 429 |
| 1149 | NP_001180345.1 | ATPGRLVDMMERGKIGLDFCKYLVLDDEADRMLDMGFEPQIRRIIVEQDTPPKGVRHTMMF                 | 381 |
| 1150 | NP_001080283.1 | ATPGRLVDMMERGKIGLDFCKYLVLDDEADRMLDMGFEPQIRRIIVEQDTPPKGVRQTMMF                 | 422 |
| 1151 | AJW08300.1     | ATPGRLLDILLERKQVSLANIKYLVLDDEADRMLDMGFEPQIRHIVEECMPSPVENRQTLMF                | 352 |
| 1152 | NP_588033.1    | ATPGRLVLDLDRGRISLANIKFLVLDEADRMLDMGFEPQIRHIVEGADMTSVEERQTLMF                  | 370 |
| 1153 |                | ***** * : * * : : . : * * * * * * * * * * * * * * * * * * * * * * * *         |     |
| 1154 |                |                                                                               |     |
| 1155 | NP_001254859.1 | SATFPKEIQLLAQDFLKENYVFLAVGRVGTSENIMQKIVVVEEDEKRSYLMDDLDDAT--                  | 489 |
| 1156 | NP_001262379.1 | SATFPKQIQELASDFLS-NYIFLAVGRVGTSENITQTILWVYEPDKRSYLLDLLSSIRD                   | 552 |
| 1157 | XP_001747837.1 | SATFPKDIQMLAQDFLD-DYVHLSVGRVGTSENITQIVHWI DEADKRSLLDLISAA--                   | 412 |
| 1158 | XP_020899200.1 | SATFPKEIQILARDFLD-NYIFLAVGRVGTSENITQKIVWVDEYDKRSFLLDLLNAS--                   | 454 |
| 1159 | XP_005168849.1 | SATFPKEIQILARDFLD-DYIFLAVGRVGTSENITQKVVVVEEDKRSFLLDLLNAT--                    | 486 |
| 1160 | NP_001180345.1 | SATFPKEIQMLARDFLD-EYIFLAVGRVGTSENITQKVVVVEESDKRSFLLDLLNAT--                   | 438 |
| 1161 | NP_001080283.1 | SATFPKEIQILARDFLD-EYIFLAVGRVGTSENITQKVVVVEEMDKRSFLLDLLNAT--                   | 479 |
| 1162 | AJW08300.1     | SATFPVDIQHLARDFLD-NYIFLSVGRVGTSENITQRILYVDDMDKKSALLDLLSA--                    | 408 |
| 1163 | NP_588033.1    | SATFPRLDQLLARDFLK-DYVFLSVGRVGTSENITQKVVHVVEDSEKRSYLLDLIHLTL--                 | 427 |
| 1164 |                | ***** : * * * * * * * * * * * * * * * * * * * * * * * * * * * * * *           |     |
| 1165 |                |                                                                               |     |
| 1166 | NP_001254859.1 | ----GDSSLTLVFVETKRGASDLAYLNRQNYEVVTHIGDLKQFEREKHLDFRTGTAPI                    | 545 |
| 1167 | NP_001262379.1 | GPEYTKDSLTLIFVETKKGADSLLEFLYQCNEPVTSHIGDRTQKEREALRCFRSGDCPI                   | 612 |
| 1168 | XP_001747837.1 | ----SSEDLFLIFVETKKAADALEYLYTMQGRPATSIHGDRTOYEREEALADFRAGRPI                   | 468 |
| 1169 | XP_020899200.1 | ----GPDALTLVFVETKKGADSLLEFLYKDYQCTSIHGDRSQSEREALRSFRSGKTP                     | 510 |
| 1170 | XP_005168849.1 | ----GKDSLTLVFVETKKGADALEDFLYREGYACTSIHGDRSQRDREALHQFRSGKCP                    | 542 |
| 1171 | NP_001180345.1 | ----GKDSLTLVFVETKKGADSLLEDFLYHEGYACTSIHGDRSQRDREALHQFRSGKSP                   | 494 |
| 1172 | NP_001080283.1 | ----GKDSLTLVFVETKKGADALEDFLYHEGYACTSIHGDRSQRDREALHQFRSGKCP                    | 535 |
| 1173 | AJW08300.1     | ----EHKGLTLIFVETKRMADQLTDFLIMQNFKATAIHGDRTOAERERALSFAKANVADI                  | 464 |
| 1174 | NP_588033.1    | ----PPEGLTLIFVETKRMADTLTDYLLNSNFPATSIHGDRTOERERALELFRSGRTSI                   | 483 |
| 1175 |                | . * * : * * * * * * * * * * * * * * * * * * * * * * * * * * * * * *           |     |
| 1176 |                |                                                                               |     |
| 1177 | NP_001254859.1 | LVATAVAARGLDIPNVKHVINYLDPDSDVEYVHRIGRTRGVGNVGLATSFNFNDKRNRIAR                 | 605 |
| 1178 | NP_001262379.1 | LVATAVAARGLDIPNVKHVINFDLPSDVEEYVHRIGRTRGMGNLGVATSFNFNEKNRNIC                  | 672 |
| 1179 | XP_001747837.1 | LVATAVAARGLDIPNVKHVINFDLPSDIEYVHRIGRTRAGHKGTAVSFFNDKRNINVAS                   | 528 |
| 1180 | XP_020899200.1 | LVATAVAARGLDINNVRHVINFDLPSDIEEYVHRIGRTRGVGHTGLATSFNFNEKNKNVAK                 | 570 |
| 1181 | XP_005168849.1 | LVATAVAARGLDISNVKHVINFDLPSDIEEYVHRIGRTRGVNGLGLATSFNFNDKNGNITK                 | 602 |
| 1182 | NP_001180345.1 | LVATAVAARGLDISNVKHVINFDLPSDIEEYVHRIGRTRGVNGLGLATSFNFERNINITK                  | 554 |
| 1183 | NP_001080283.1 | LVATAVAARGLDISNVKHVINFDLPSDIEEYVHRIGRTRGVNGLGLATSFNFNEKNINITK                 | 595 |
| 1184 | AJW08300.1     | LVATAVAARGLDIPNVTHVINYLDPDSDIDYVHRIGRTRAGNTGVATSFNFNSNNQNIIVK                 | 524 |
| 1185 | NP_588033.1    | MVATAVASRGLDIPNVTHVINYLDPDSDIDYVHRIGRTRAGNTGVAVAFFNRRNKGIKIAK                 | 543 |
| 1186 |                | : * * * * * * * * * * * * * * * * * * * * * * * * * * * * * *                 |     |
| 1187 |                |                                                                               |     |
| 1188 | NP_001254859.1 | ELMDLIVEANQELPDWLEGMSSGDMRSGGGYRGRGGG---NGQRFGRDRHRYQGGSGNG                   | 661 |
| 1189 | NP_001262379.1 | DLELLIETKQEIPIPSFMDMSSDRGHGAKRAGRGGG---GRYGGGFGSRDYRQSSGGGGG                  | 730 |
| 1190 | XP_001747837.1 | DLN-----                                                                      | 532 |
| 1191 | XP_020899200.1 | DLLSLVTETGQEVPSWLESIAYESNQNSKRG-----P---RRYGGFGSRDYRQQRGNSAQ                  | 623 |
| 1192 | XP_005168849.1 | DLLDILVEAKQEVPSWLESILAYEHQHKSSSRG---RSK---RFSGGFGARDYRQNSSGGG                 | 657 |
| 1193 | NP_001180345.1 | DLLDLLVEAKQEVPSWLENMAYEHYKSSSRG---RSK---SRFSGGFGARDYRQSSGASS                  | 610 |
| 1194 | NP_001080283.1 | DLLDLLVEAKQEVPSWLENMAYEQHKSSSRG---RSK---SRFSGGFGAKDYRQSSSAGSS                 | 651 |
| 1195 | AJW08300.1     | GLMEILNEANQEVPTFLSDLRQNSRGGRTRGGGGF---FNSRNNGSRDYRKHGSSGSF                    | 580 |
| 1196 | NP_588033.1    | ELTELLQEANQECPSFLIAMARESSFGNGRGGGRYSGRGGGNGAYGARDFRRPTNSSSG                   | 603 |
| 1197 |                | * : .                                                                         |     |
| 1198 |                |                                                                               |     |
| 1199 | NP_001254859.1 | GGG---NGGGGGFGGGG-----QSRGGGG---GFQSGG---GGGRQQQ                              | 695 |
| 1200 | NP_001262379.1 | GRSGPPPSGGSGSGGGGGSYRS---NGNSYKFGGNSGGGGYGGGAGGGSYGGSYGGG                     | 787 |
| 1201 | XP_001747837.1 | -----                                                                         | 532 |
| 1202 | XP_020899200.1 | MNQM---HGYYGGGGGGYMHY---GGYSG---GGGGGGSGGRYH---GGGGG                          | 665 |
| 1203 | XP_005168849.1 | -----GFGGRGG---RSTGGHGGNR---GFGGGGFGNFYSSDYGYYGGY---                          | 694 |
| 1204 | NP_001180345.1 | -----SFSSSRASSRSRSGGGGGHSSR---GFGGGYGGFYNSDYGYYGGYNS-                         | 653 |
| 1205 | NP_001080283.1 | -----FGSSRG---GRSSGHGGRS---AFG-GGYGGFYNSDYGYYGGYGG-                           | 688 |
| 1206 | AJW08300.1     | GSTRP-RNTGTSNWSIGGGFRND-----NEKNYGG-                                          | 610 |
| 1207 | NP_588033.1    | YSSGP-SYSG---Y---GGFESRT-----PHHGNTYN--                                       | 628 |
| 1208 |                |                                                                               |     |
| 1209 |                |                                                                               |     |
| 1210 | NP_001254859.1 | QQRAQPQQDWWS- 708                                                             |     |

|      |                |                 |     |
|------|----------------|-----------------|-----|
| 1211 | NP_001262379.1 | SASHSSNAPDWWAQ  | 801 |
| 1212 | XP_001747837.1 | -----           | 532 |
| 1213 | XP_020899200.1 | -----GGGQDWWN-  | 673 |
| 1214 | XP_005168849.1 | -----SQVDWWGN   | 702 |
| 1215 | NP_001180345.1 | -----QGVDWWGN   | 661 |
| 1216 | NP_001080283.1 | -----SSQVDWWGN  | 697 |
| 1217 | AJW08300.1     | -----SSNASWW--  | 617 |
| 1218 | NP_588033.1    | -----SGSAQSWW-- | 636 |
| 1219 |                |                 |     |

1220 **1.4 Calculation of minimum possible SCD for sequence with same composition as LAF-1 RGG**

1221 To obtain a sequence with the minimum possible SCD value, the charged amino acids must be clustered  
 1222 at the very ends of the sequence with positive charges at one end, negative charges at the other, and  
 1223 uncharged amino acids in between. Since we consider histidine in our model to have a +0.5 charge, the +1  
 1224 charged amino acids should be at the very end with histidine residues following.

1225 We also must consider that for in vitro studies, the initial methionine residue and the LEHHHHHH tag must  
 1226 be conserved. Thus a sequence with minimum possible SCD is:

1227 MDDDDDDDDDDDDDDDDDEEEE . . . . . HRRRRRRRRRRRRRRRRRRRRRRRRRRRRRRRRRLEHHHHHHH

1228 with all of the uncharged residues in between the negatively-charged N-terminal, and the positively-charged  
 1229 C-terminal, and having an SCD of -28.032. Note that since D and E have the same charge, any permutation  
 1230 of residues 2-21 would not change the SCD value.

1231 The probability of randomly sampling a sequence with the minimum SCD value can be calculated by  
 1232 considering the number of residues being shuffled as  $176 - 9 = 167$ . Then one must consider the four  
 1233 regions that must be correct:

- 1234 1. All D and E residues within 2-21
- 1235 2. All R residues within 145-168
- 1236 3. H residue at 144
- 1237 4. All uncharged residues within 22-143

1238 To account for these values and the degeneracies, we can calculate the probability of randomly sampling  
 1239 such a sequence as

1240 
$$p_{minSCD} = \frac{n_{DE}! \cdot n_{RK}! \cdot n_H! \cdot (n - n_{DE} - n_{RK} - n_H)!}{n!} = \frac{20! \cdot 24! \cdot 1! \cdot 122!}{167!} = 0.9914 \times 10^{-56}$$

1241  
 1242  
 1243  
 1244  
 1245  
 1246  
 1247  
 1248  
 1249  
 1250

1251

## 2. SI Figures

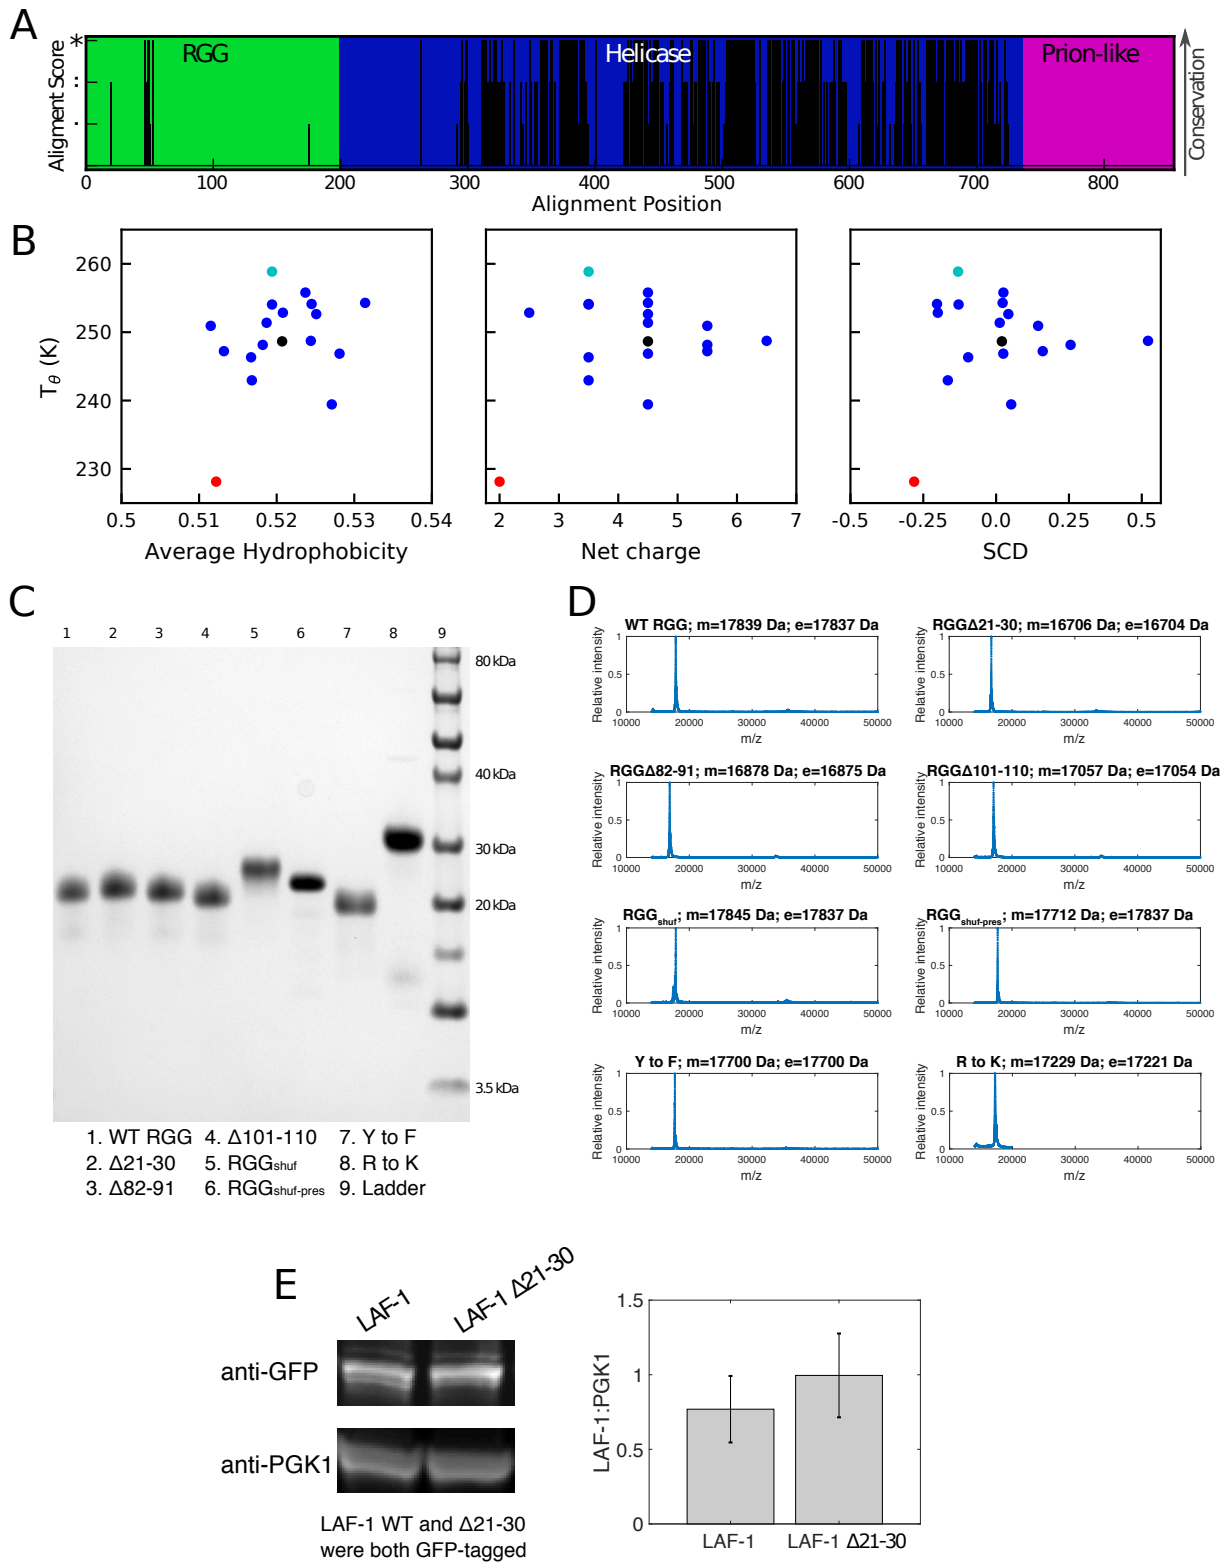

1252

1253

**Figure S1: Characterization of deletion variants of LAF-1 RGG:** A) Sequence conservation of full-

1254 length LAF-1, showing a high degree of conservation in folded helicase domain, and poor conservation in  
1255 disordered RGG and prion-like domains. B)  $T_{\theta}$  calculated from single-chain simulations of the deletion  
1256 series (Fig. 1C) compared to sequence descriptors. In general, higher  $T_{\theta}$  is expected to be associated  
1257 with higher average hydrophobicity, smaller absolute net charge, and more negative SCD. The symbol  
1258 colors correspond to WT (black),  $\Delta 21-30$  (red),  $\Delta 101-110$  (cyan), with all other variants represented as  
1259 blue. C) SDS-PAGE gel of purified RGG and its variants. D) MALDI-TOF mass spectra of RGG domain  
1260 and its variants, where m denotes measured and e denotes expected molecular mass. The only  
1261 discrepancy  $> 10$  Da is RGG<sub>shuf-pres</sub> which is likely due to the loss of initiating methionine. E) Western blot  
1262 shows a similar expression level of LAF-1 WT and LAF-1  $\Delta 21-30$  in yeast.



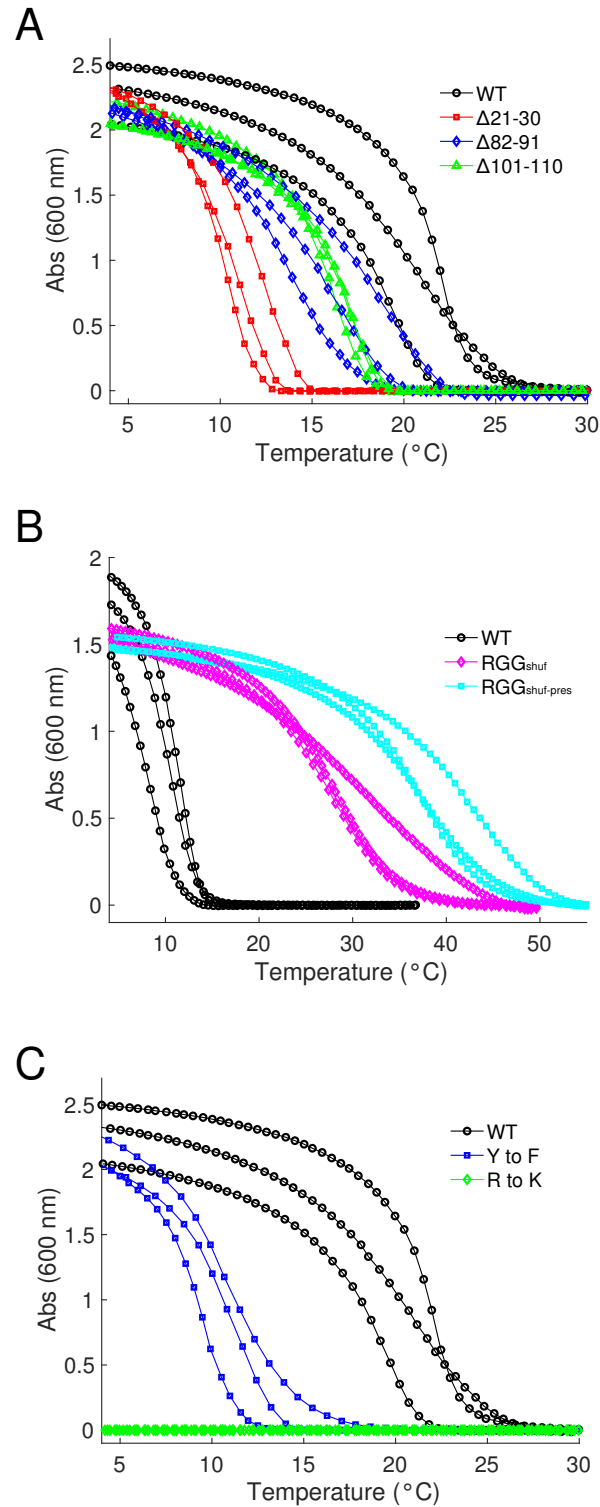

1263

1264 **Figure S2: Replicates of turbidity experiments** (corresponding to Fig. 1D, 2D, 3B): Turbidity curves of

1265 WT and A) deletion variants, B) shuffled sequences, and C) bulk mutations. Protein concentrations were

1266 1 mg/mL for (A) and (C) and 0.3 mg/mL in (B). WT data is the same for (A) and (C). In all cases, proteins

1267 were in 150 mM NaCl, 20 mM Tris, pH 7.5.

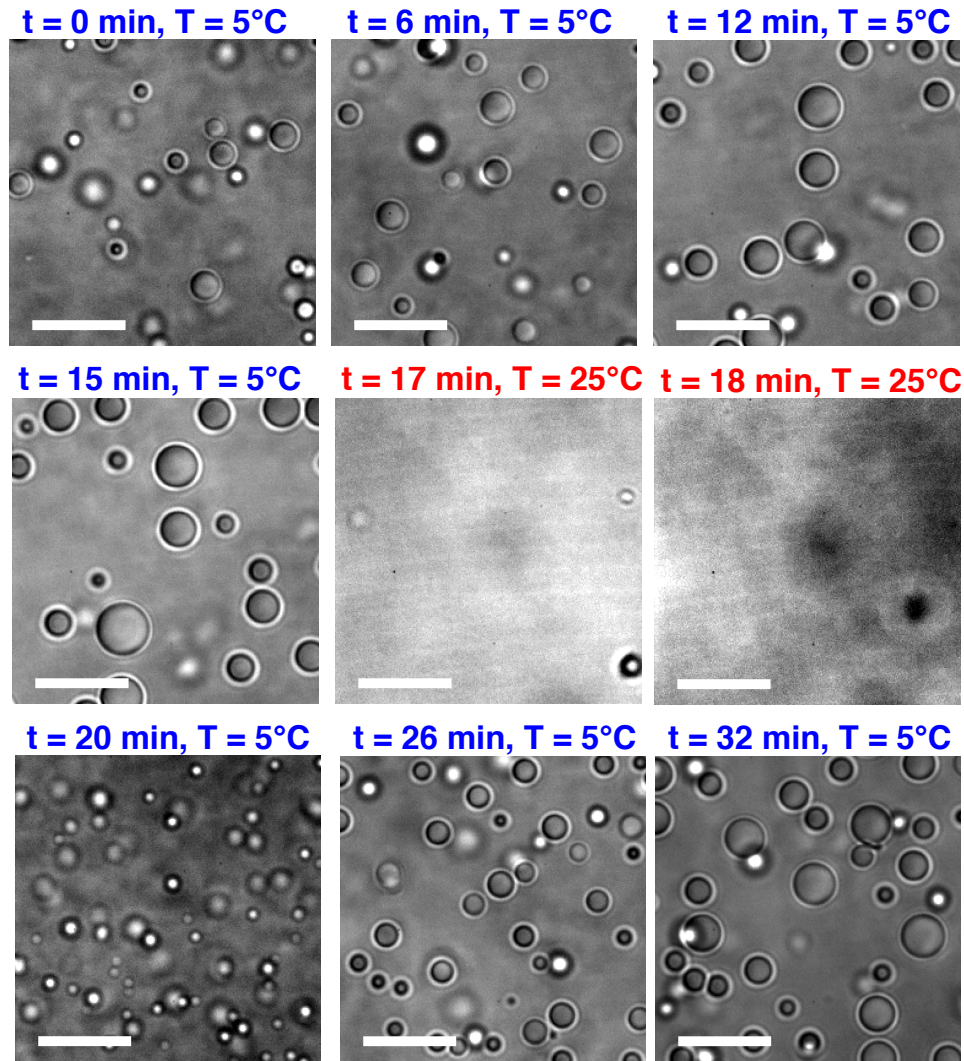

1268

1269 **Figure S3: Reversible LLPS of  $\Delta 21-30$  variant:** The  $\Delta 21-30$  variant of RGG undergoes reversible,

1270 temperature-dependent LLPS. Snapshots follow the formation of droplets over time starting at low

1271 temperature (5 °C ), then rapidly increasing temperature from 5 °C to 25 °C to disperse the droplets, and

1272 then rapidly decreasing the temperature back to 5 °C to induce phase separation again. Scale bars: 10  $\mu\text{m}$ .

1273

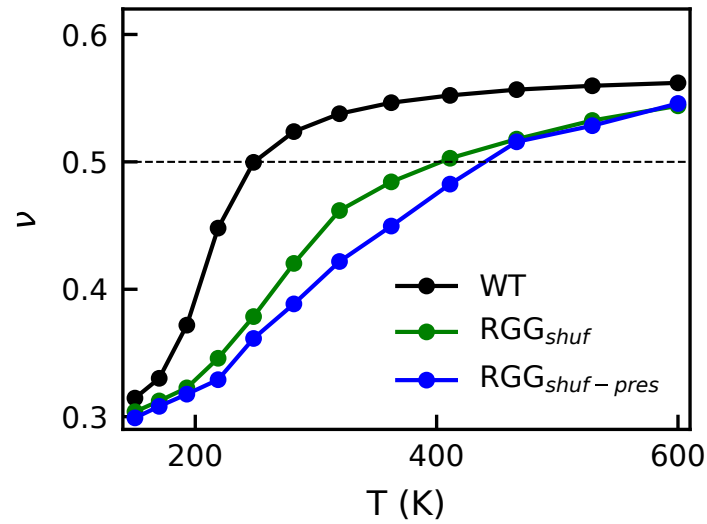

1274

1275 **Figure S4: Single-chain compactness of RGG and shuffled variants:** We calculate the Flory scaling

1276 exponent ( $\nu$ ) of the three variants of RGG as in previous work<sup>40,76</sup> and see that the WT is significantly

1277 more extended than the shuffled variants at a wide range of temperatures. We also see that RGG<sub>shuf-pres</sub>

1278 is marginally more compact than RGG<sub>shuf</sub>, consistent with our experimental results showing that

1279 RGG<sub>shuf-pres</sub> has the greatest LLPS propensity.

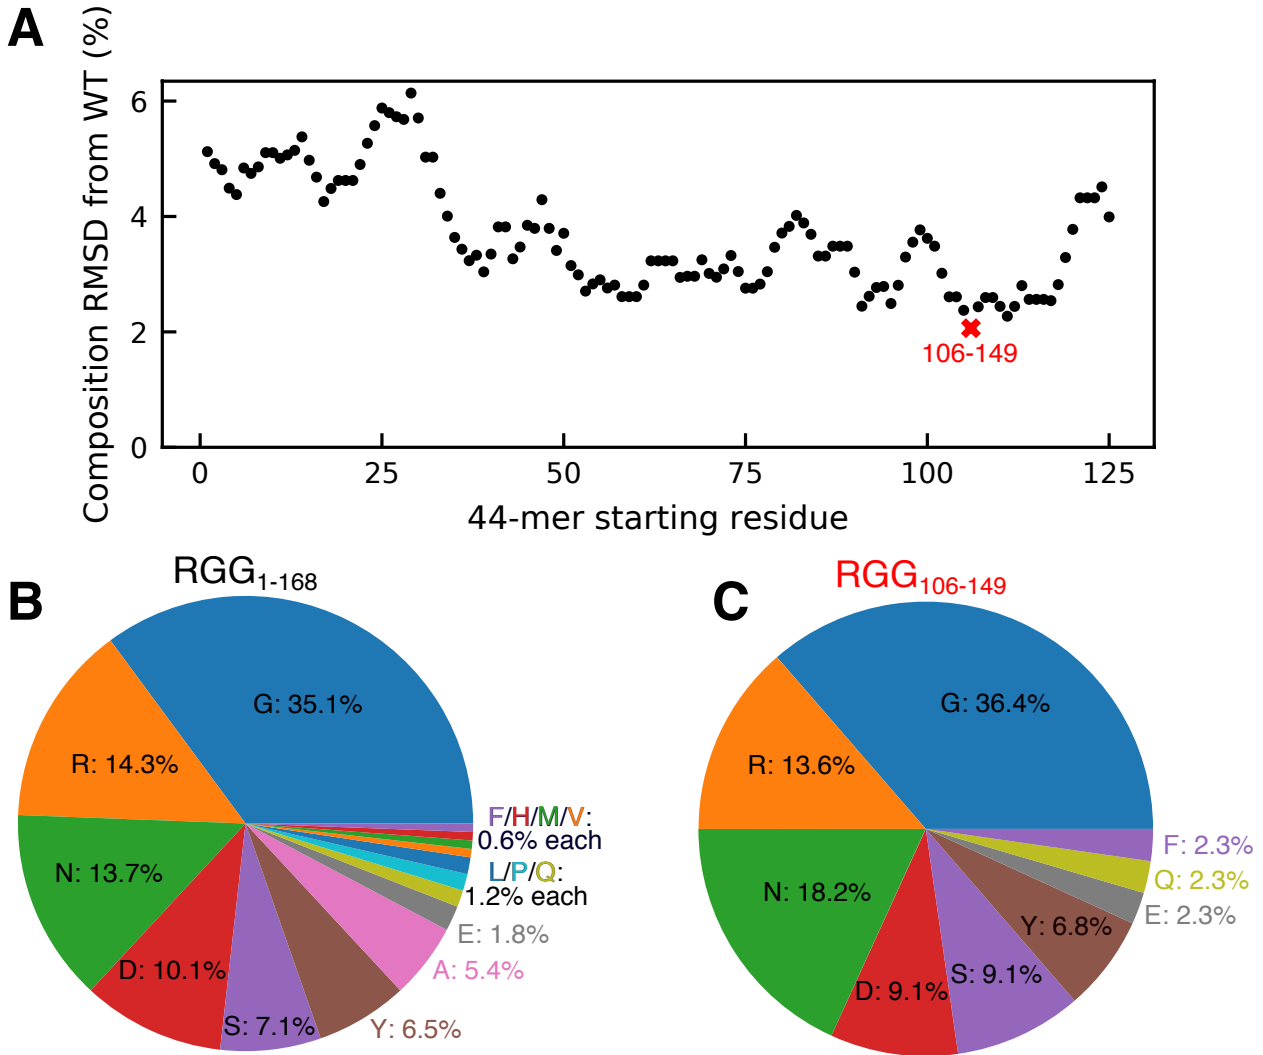

1280

1281 **Fig S5: Sequence composition of WT RGG and 44-residue fragments:** A) Composition-based RMSD

1282 is calculated for all continuous 44-residue fragments of LAF-1 RGG, showing the overall compositional

1283 similarity with the full 168-residue sequence. A total of  $168 - 44 + 1 = 125$  sequences of 44 residues were

1284 tested. B) Pie chart of amino acid composition of WT RGG is highly similar to C) pie chart of the lowest-

1285 RMSD 44-mer, RGG<sub>106-149</sub>.

1286

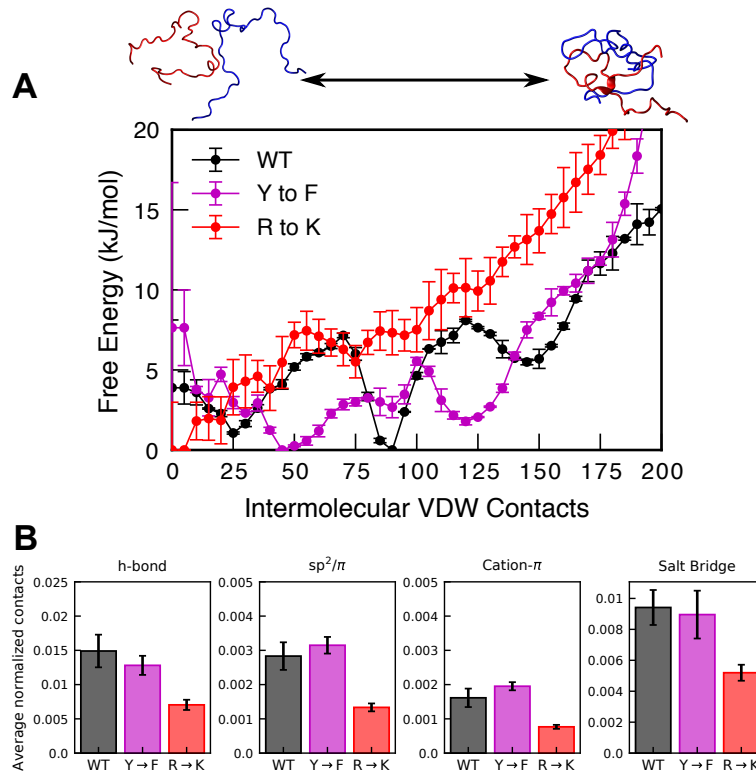

1287

1288 **Figure S6: All-atom simulations of RGG<sub>106-149</sub> show R→K has lower self-association:** A) Free energy  
1289 profile of contact formation between two identical RGG<sub>106-149</sub> chains from simulations using well-tempered  
1290 metadynamics. Both WT and Y→F show global minima at a finite number of contacts, while R→K has a  
1291 global minimum at 0 contacts, indicating unfavorable self-interaction. B) Average total number of  
1292 intermolecular contacts from two-chain simulations normalized by the average total number of VDW  
1293 contacts for that system. Errorbars for all plots are SEM with n = 2.

1294

1295

1296

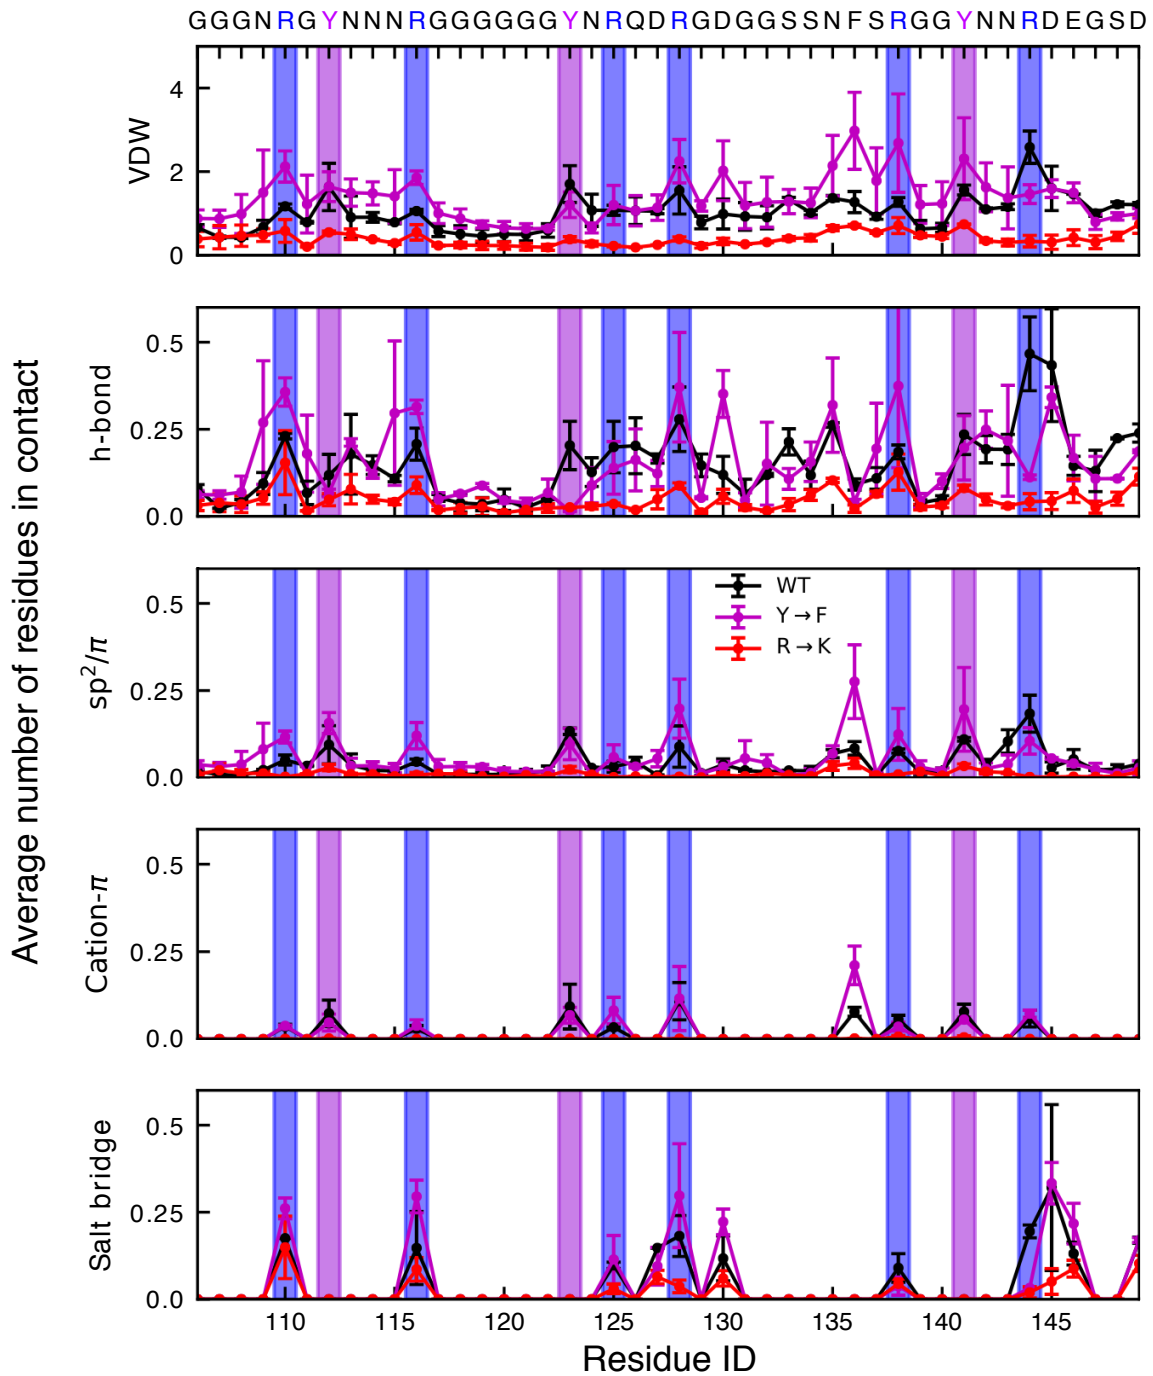

1297

1298

1299

1300

1301

1302

**Figure S7: Per-residue contacts from all-atom simulations:** Average number of intermolecular residue-residue pairs for each residue of the RGG<sub>106-149</sub> sequence. Two residues are considered to be in contact if there is at least one atom from each residue in contact (VDW) or at least one hydrogen bond,  $sp^2/\pi$  interaction, cation- $\pi$  interaction, or salt bridge between the two residues. In the case of VDW, multiple residues may be in contact with a single residue as only one atom needs to be in contact, and

1303 residues may have VDW interactions with many other amino acids on the other protein chain. Generally,  
1304 we see that VDW interactions and hydrogen bonds are well-distributed throughout the sequence for all  
1305 variants of RGG106-149. Cation- $\pi$ ,  $sp^2/\pi$ , and salt-bridge interactions are less well-distributed due to their  
1306 dependence on certain amino acid side chains. To highlight the contribution of aromatic and cationic  
1307 residues, we have highlighted the arginine and tyrosine residues in these plots. Error bars are SEM with  
1308  $n = 2$ .

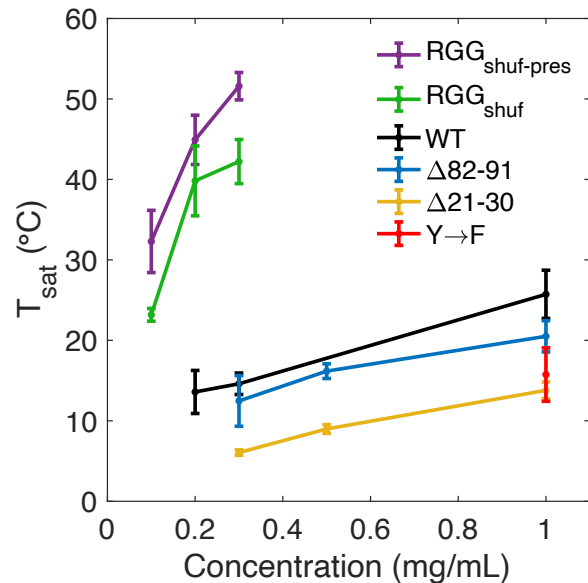

1309 **Figure S8: Phase diagrams of RGG mutants:** Saturation temperature as a function of total protein  
1310 concentration for the two shuffled variants, two deletion variants, Y→F, and WT RGG.  $T_{sat}$  values are  
1311 determined from turbidity curves where absorbance first exceeds 0.02. Error bars are STD with  $n = 3$ .  $T_{sat}$   
1312 of WT is significantly different than that of  $\Delta 21-30$ , RGG<sub>shuf</sub>, and RGG<sub>shuf-pres</sub> ( $p \leq 0.005$ ), but not  
1313 significantly different than that of  $\Delta 82-91$  ( $p = 0.73$ ), based on one-way ANOVA followed by Tukey's post-  
1314 hoc test at 0.3 mg/mL.  $T_{sat}$  of WT is significantly different than that of  $\Delta 21-30$  and Y→F ( $p \leq 0.005$ ), but  
1315 not  $\Delta 82-91$  ( $p = 0.12$ ), based on one-way ANOVA followed by Tukey's post-hoc test at 1 mg/mL.

1317

1318



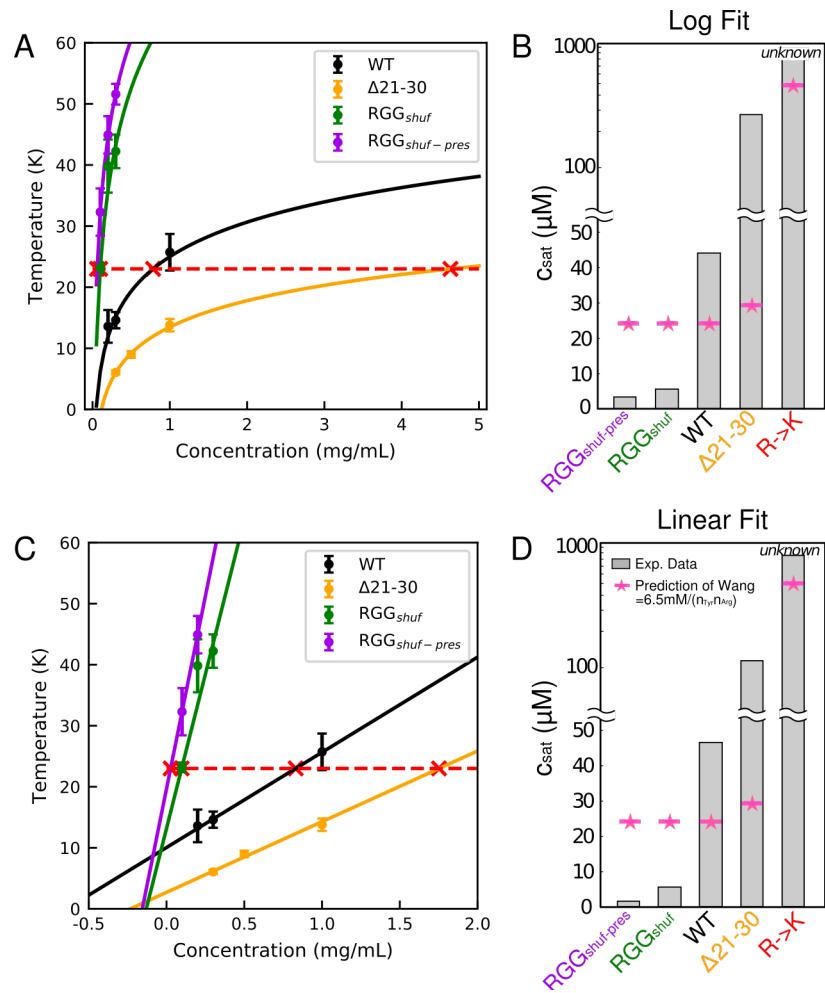

1319  
 1320  
 1321  
 1322  
 1323  
 1324  
 1325  
 1326  
 1327

**Figure S9: Fitting of  $c_{sat}$  from experimental data:** A) Logarithmic fits to experimental data to calculate  $c_{sat}$  (red X's) at 23°C, (red dashed line). B) bar plot of saturation concentrations for the different variants of RGG and comparison to empirical predictions using relationship from Wang et al. C) Linear fits to experimental data to calculate  $c_{sat}$  as before. For  $RGG_{shuf-pres}$ , one data point was removed from the fitting such that the extrapolated  $c_{sat}$  value would be positive. D) bar plot of saturation concentrations for the different variants of RGG using the linear fit and compared to empirical predictions using relationship from Wang et al. Error bars are STD with  $n = 3$ .

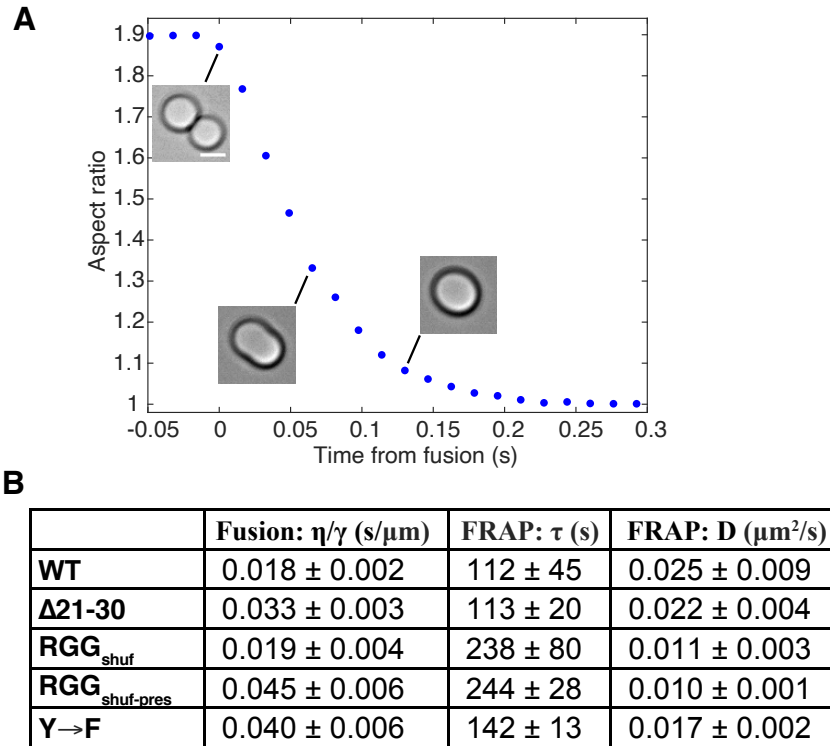

1328

1329 **Figure S10: Measurements of droplet material properties:** A) Example trace showing aspect ratio of  
 1330 fusing droplets relaxing exponentially to a sphere, from which the relaxation timescale is calculated. The  
 1331 data shown corresponds to the Y→F droplet fusion event in Fig. 5A, several images of which are  
 1332 reproduced here as insets beside their corresponding data points (scale bar: 2  $\mu\text{m}$ ). B) Table  
 1333 summarizing measurements of inverse capillary velocity  $\eta/\gamma$  from droplet fusion experiments, as well as  
 1334 recovery timescale  $\tau$  and diffusivity  $D$  from FRAP.
